# Supplementary material for: Mild and efficient copper-catalyzed oxidative cyclization of oximes with 2-aminobenzyl alcohols at room temperature: synthesis of polysubstituted quinolines
Source: Royal Society of Chemistry journal article supplement (doi:10.1039/d0ob02348e), 2020-12-22

Electronic Supplementary Material (ESI) for Organic & Biomolecular  
Chemistry

This journal is © The Royal Society of Chemistry 2020

## Supporting Information

# Mild and Efficient Copper-Catalyzed Oxidative Cyclization of Oximes with 2- Aminobenzyl Alcohols at Room Temperature: Synthesis of Polysubstituted Quinolines

Yan-Yun Liu\*, Yang Wei, Zhi-Hui Huang, and Yilin Liu\*

*Institute of Organic Synthesis, College of Chemistry and Materials Engineering, Huaihua  
University, Huaihua 418008, China*

*E-mail: [liuyanyun314@sina.com](mailto:liuyanyun314@sina.com) and [liuyilinhn@126.com](mailto:liuyilinhn@126.com)*

### List of Contents

|                                       |    |
|---------------------------------------|----|
| 1. Copies of NMR spectra of compounds | S2 |
|---------------------------------------|----|

## 1. Copies of NMR spectra of compounds

$^1\text{H}$  and  $^{13}\text{C}$  NMR spectra of compound **3aa** in  $\text{CDCl}_3$  (400 MHz)

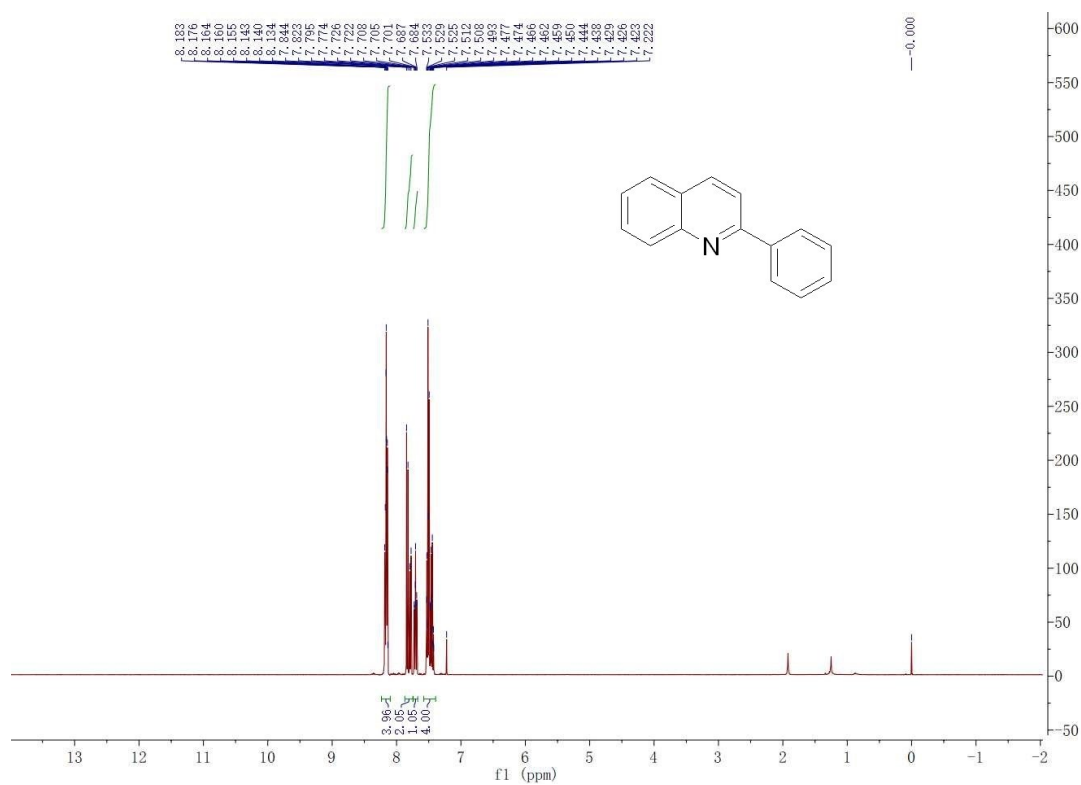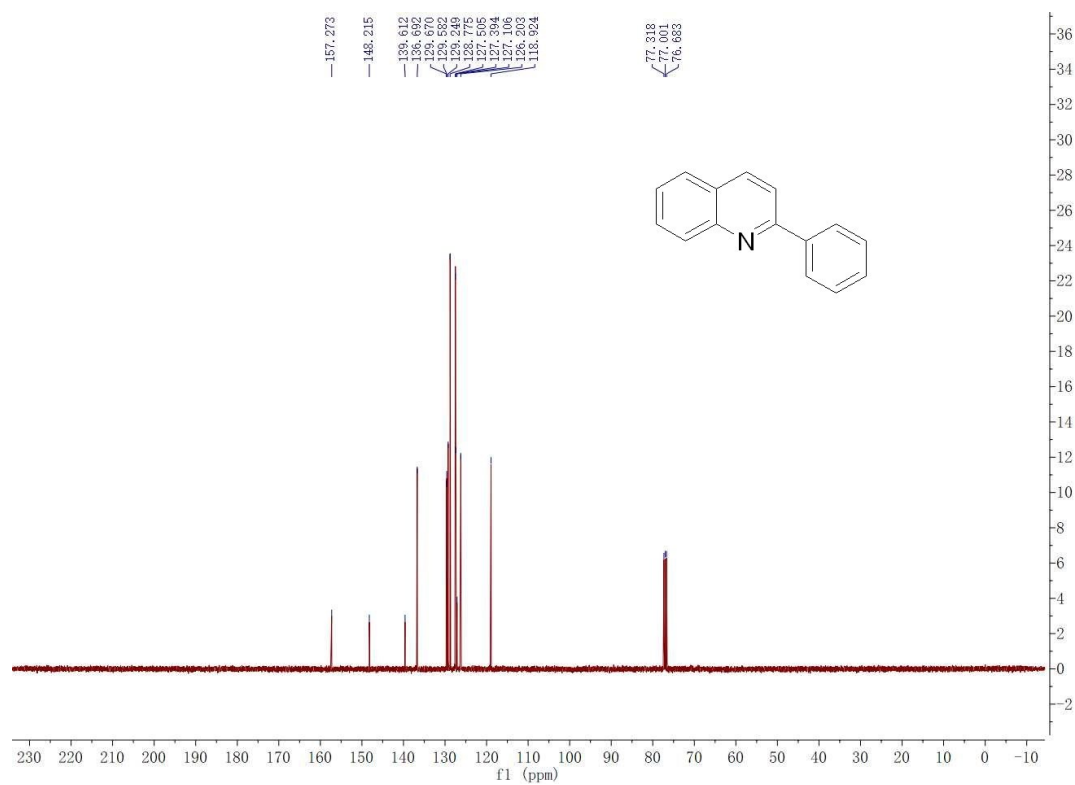

$^1\text{H}$  and  $^{13}\text{C}$  NMR spectra of compound **3ba** in  $\text{CDCl}_3$  (400 MHz)

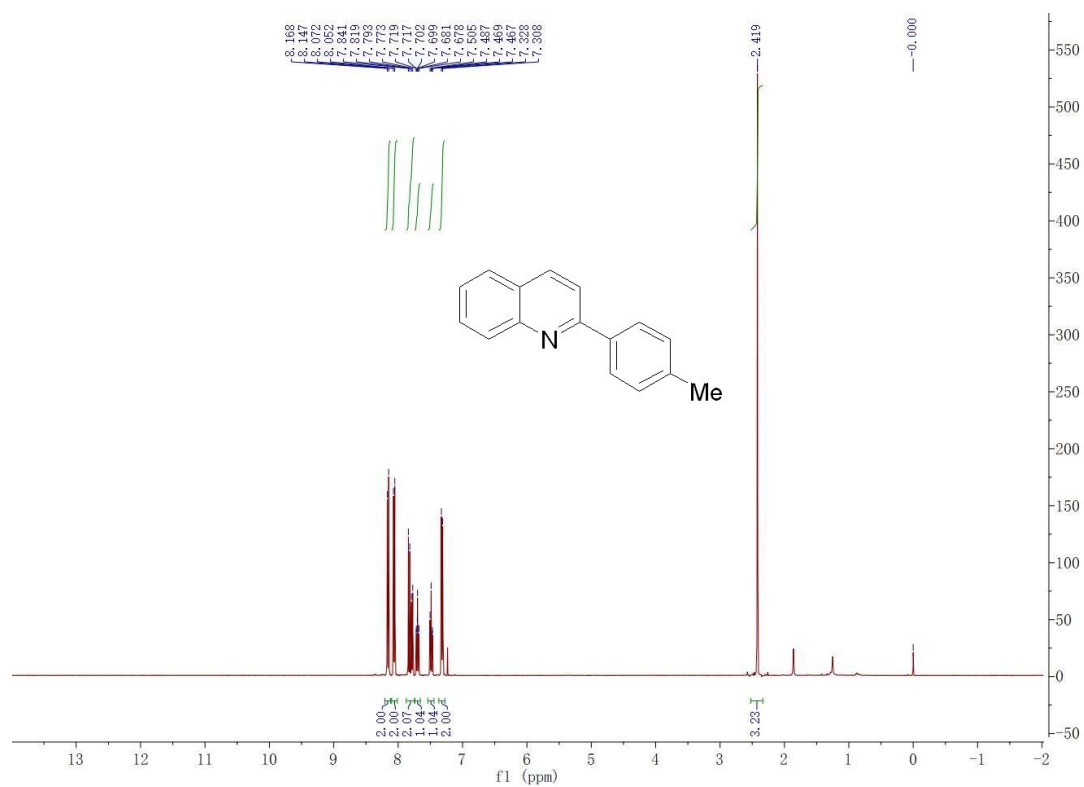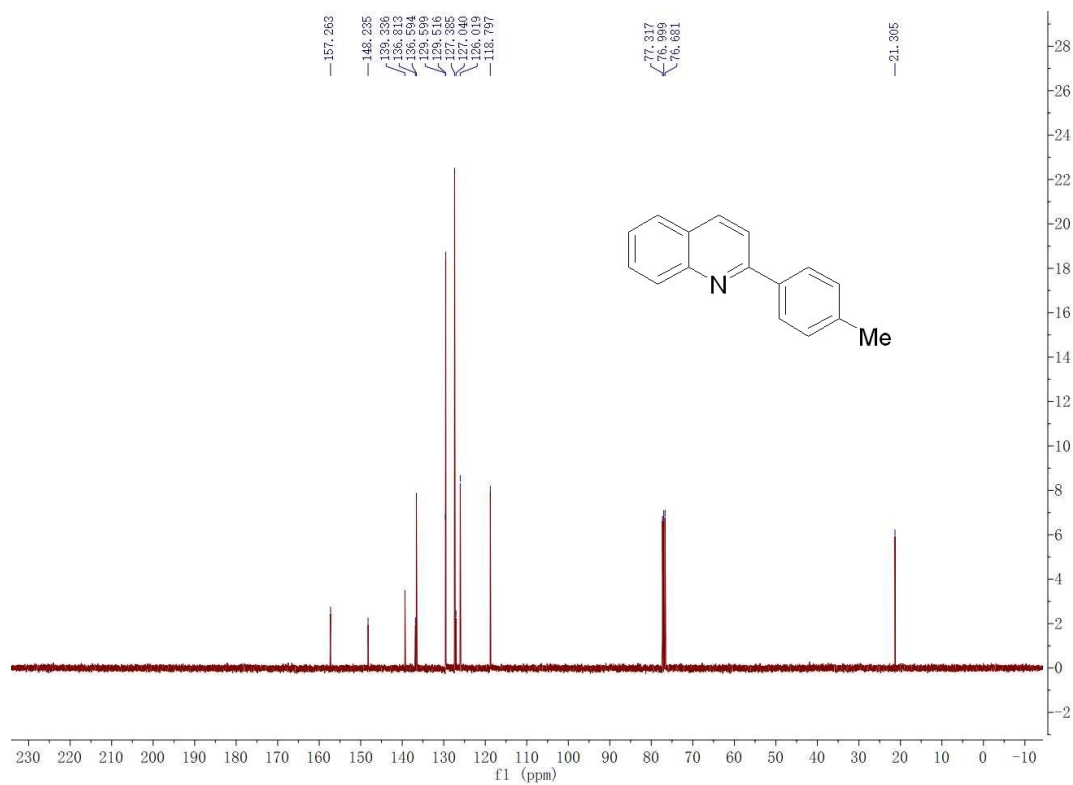

$^1\text{H}$  and  $^{13}\text{C}$  NMR spectra of compound **3ca** in  $\text{CDCl}_3$  (400 MHz)

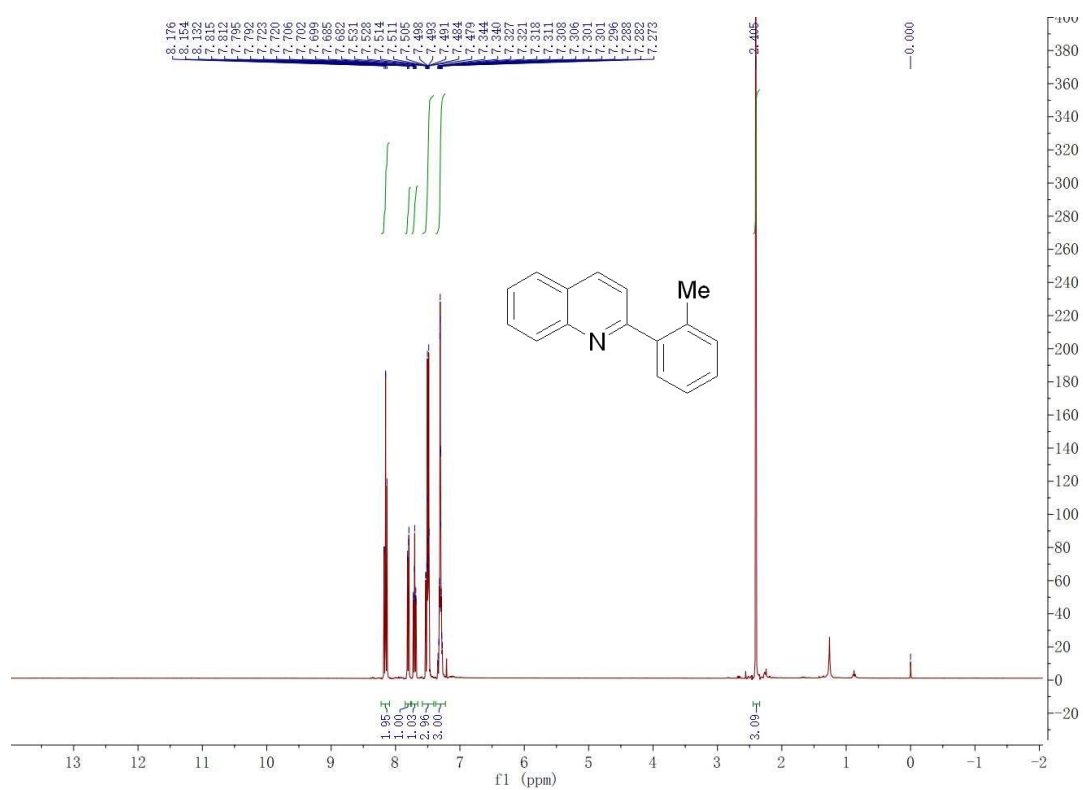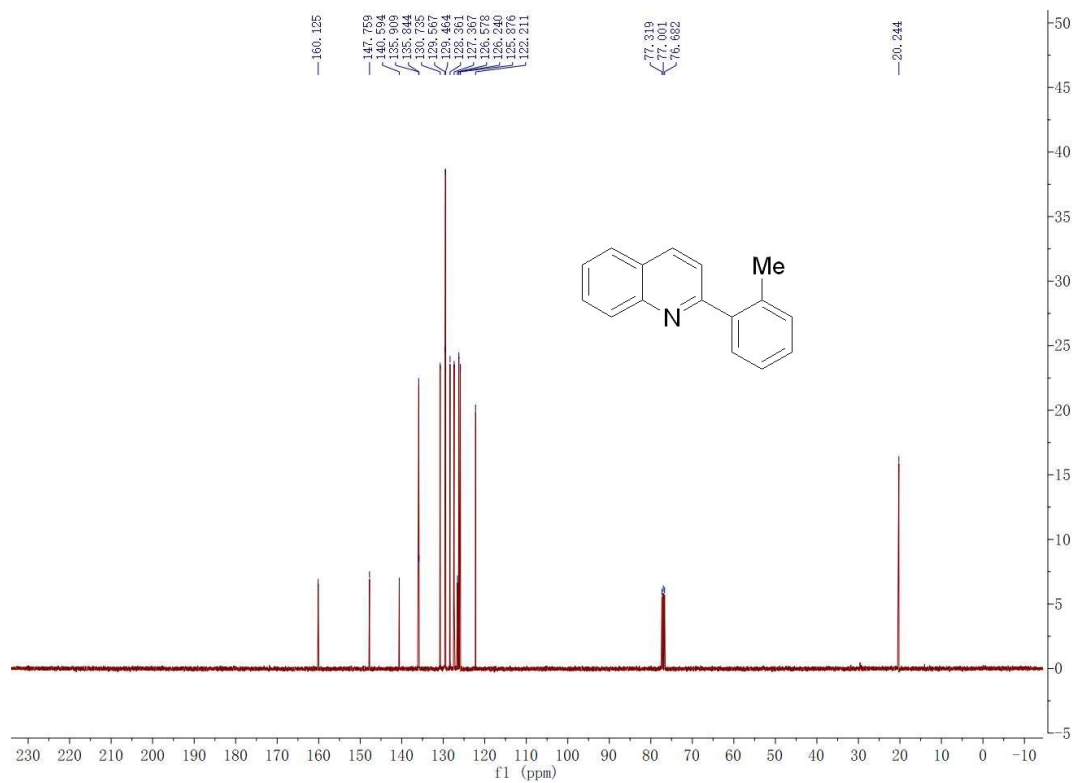

$^1\text{H}$  and  $^{13}\text{C}$  NMR spectra of compound **3da** in  $\text{CDCl}_3$  (400 MHz)

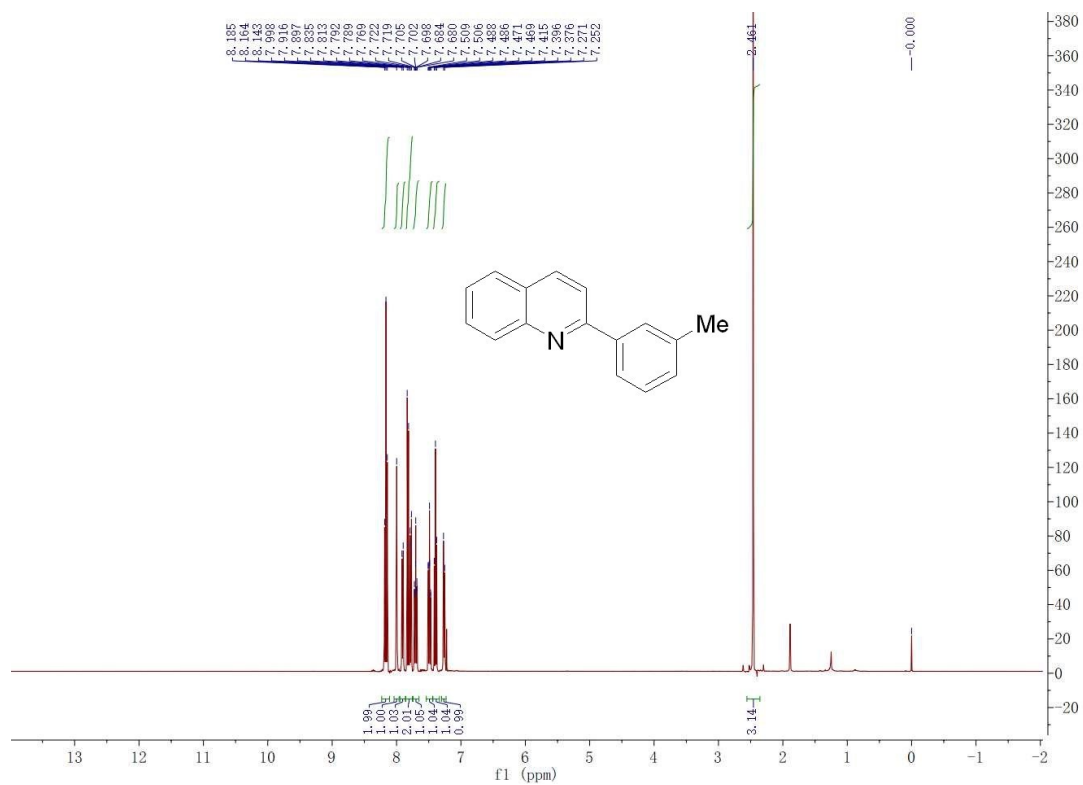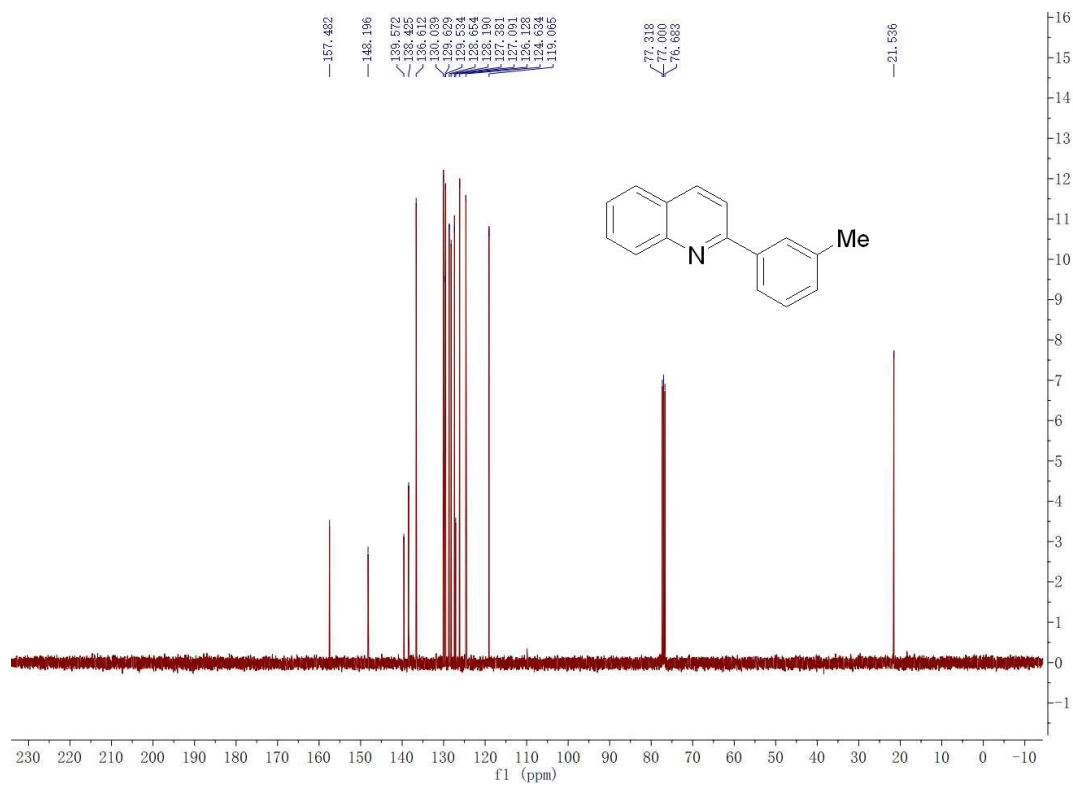

$^1\text{H}$  and  $^{13}\text{C}$  NMR spectra of compound **3ea** in  $\text{CDCl}_3$  (400 MHz)

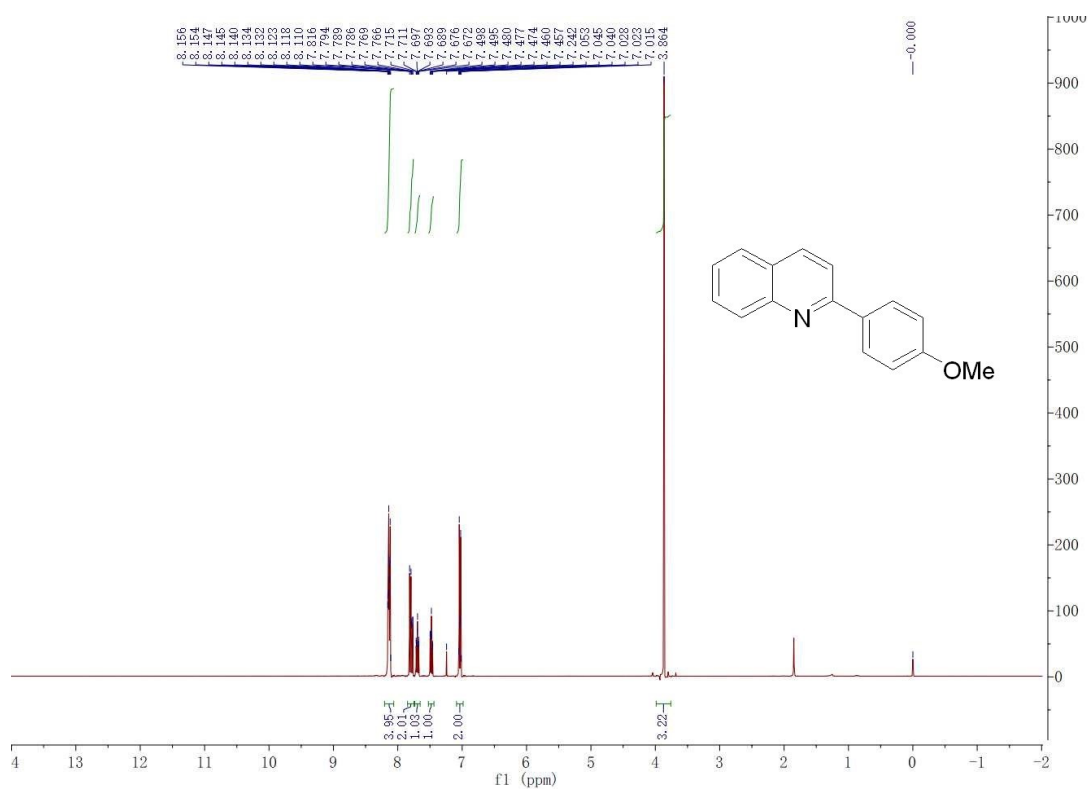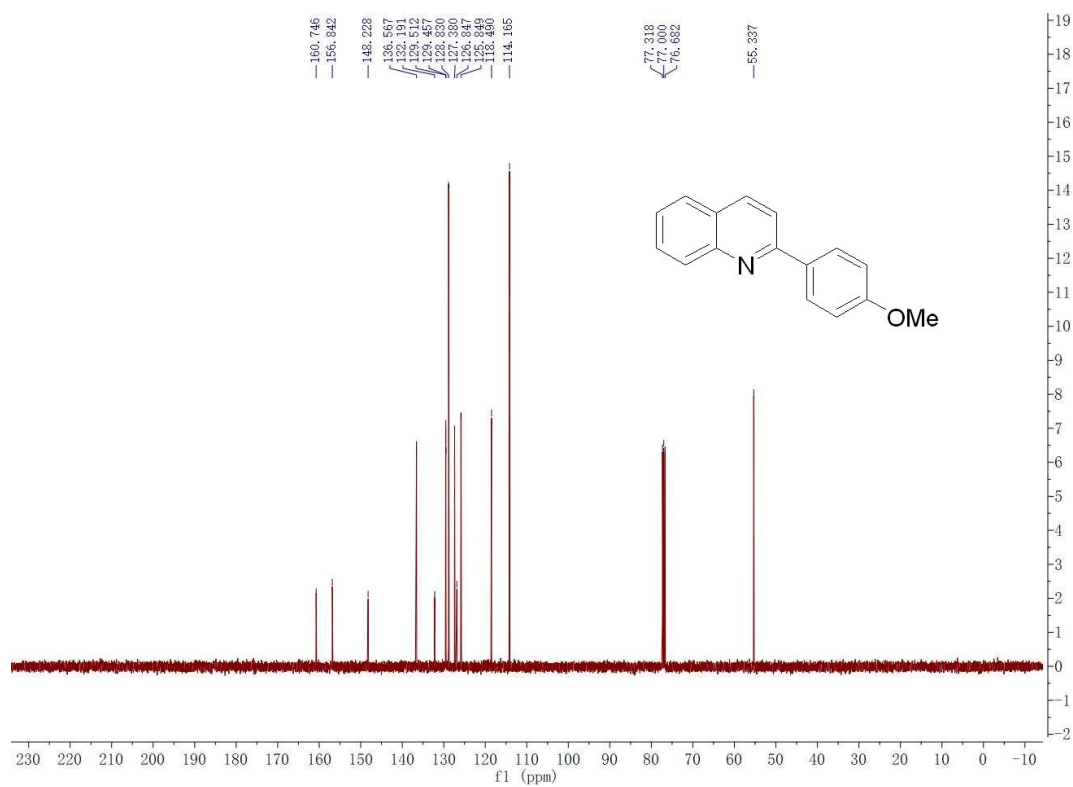

$^1\text{H}$  and  $^{13}\text{C}$  NMR spectra of compound **3fa** in  $\text{CDCl}_3$  (400 MHz)

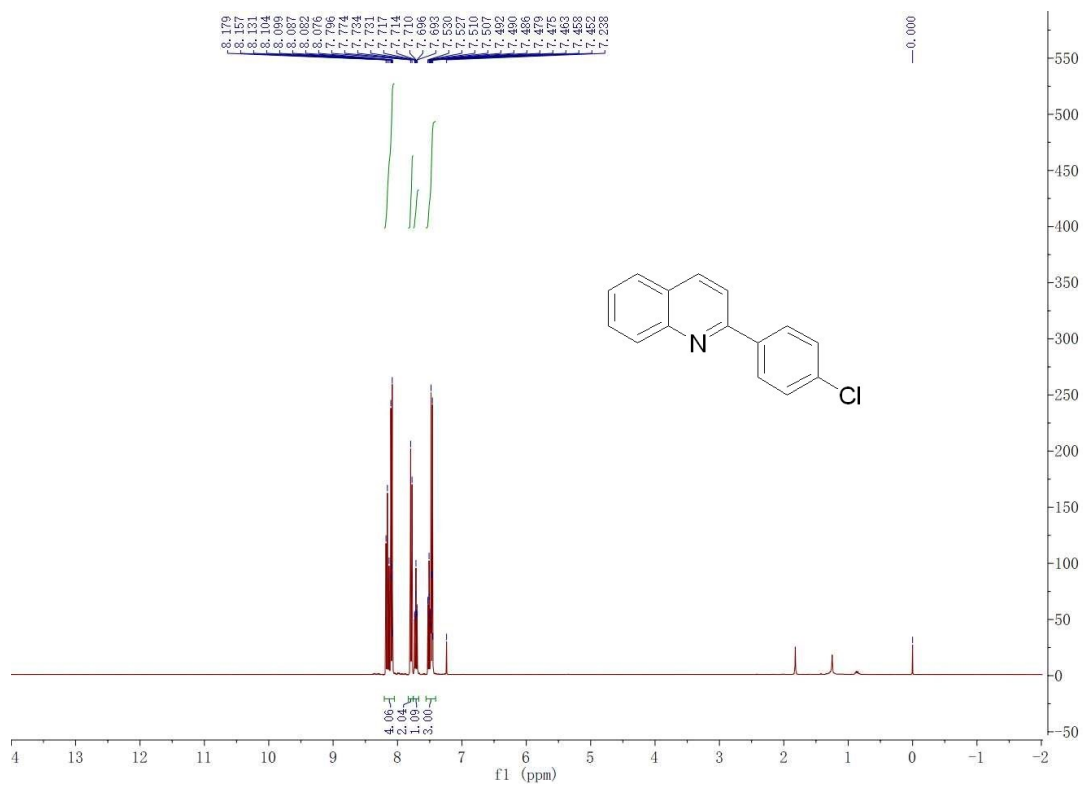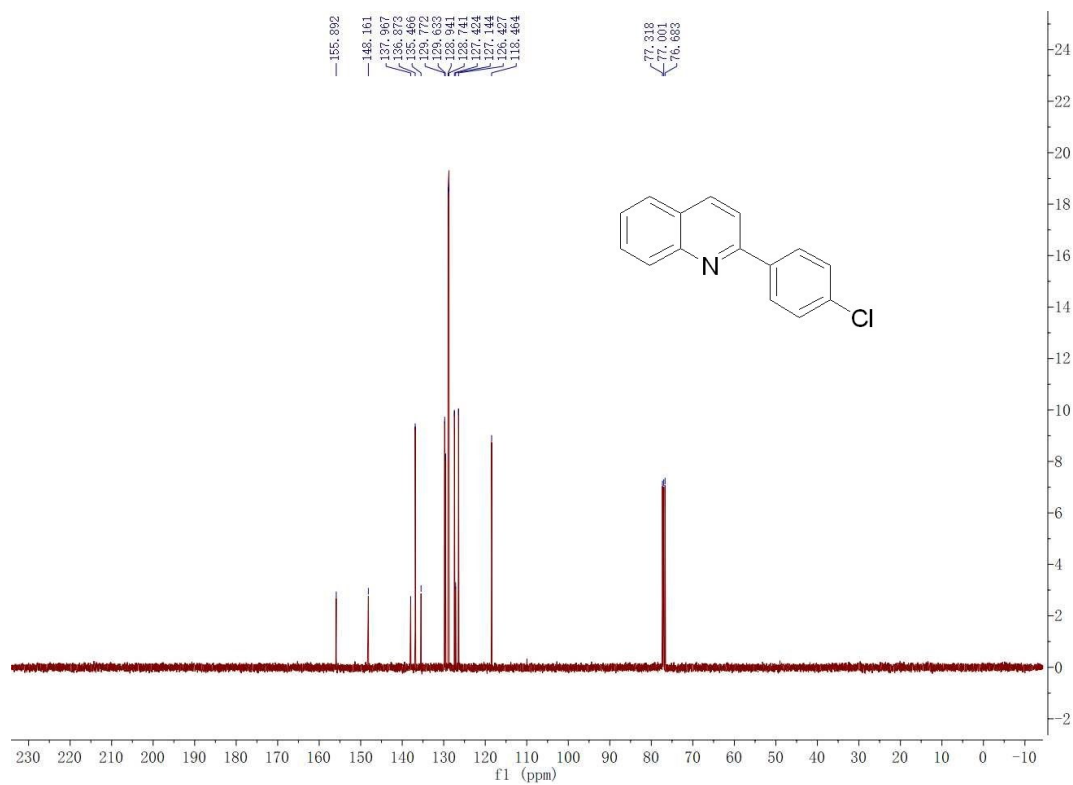

$^1\text{H}$  and  $^{13}\text{C}$  NMR spectra of compound **3ga** in  $\text{CDCl}_3$  (400 MHz)

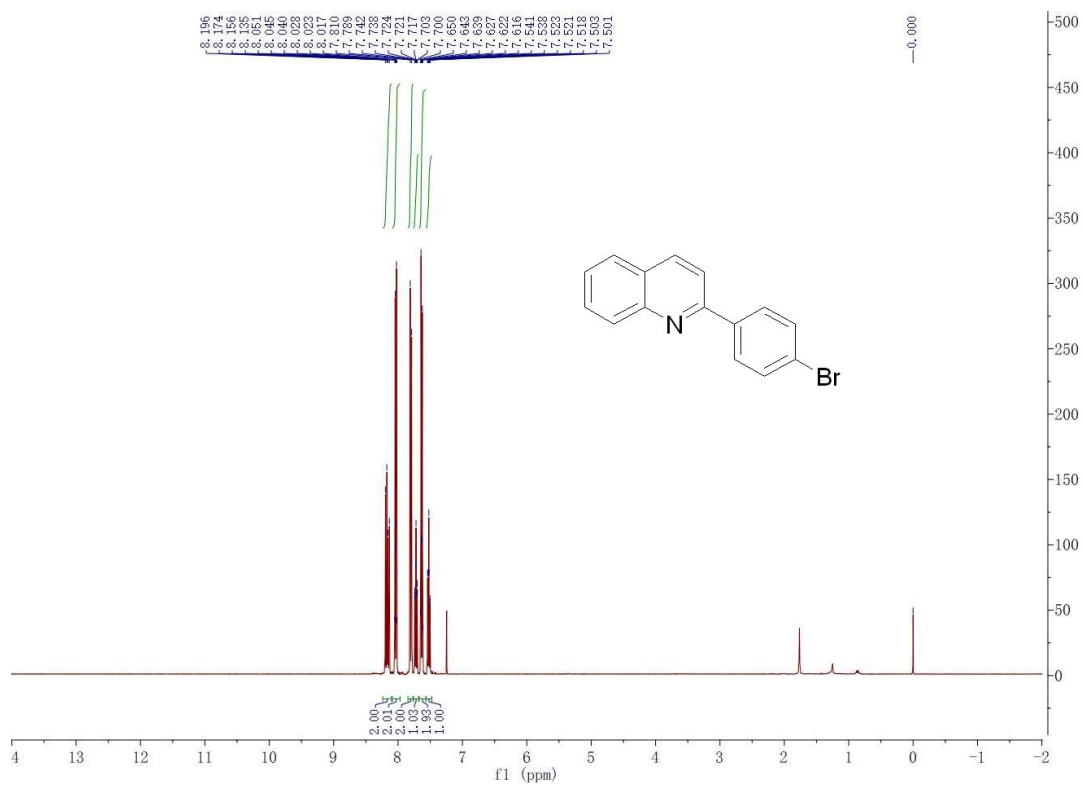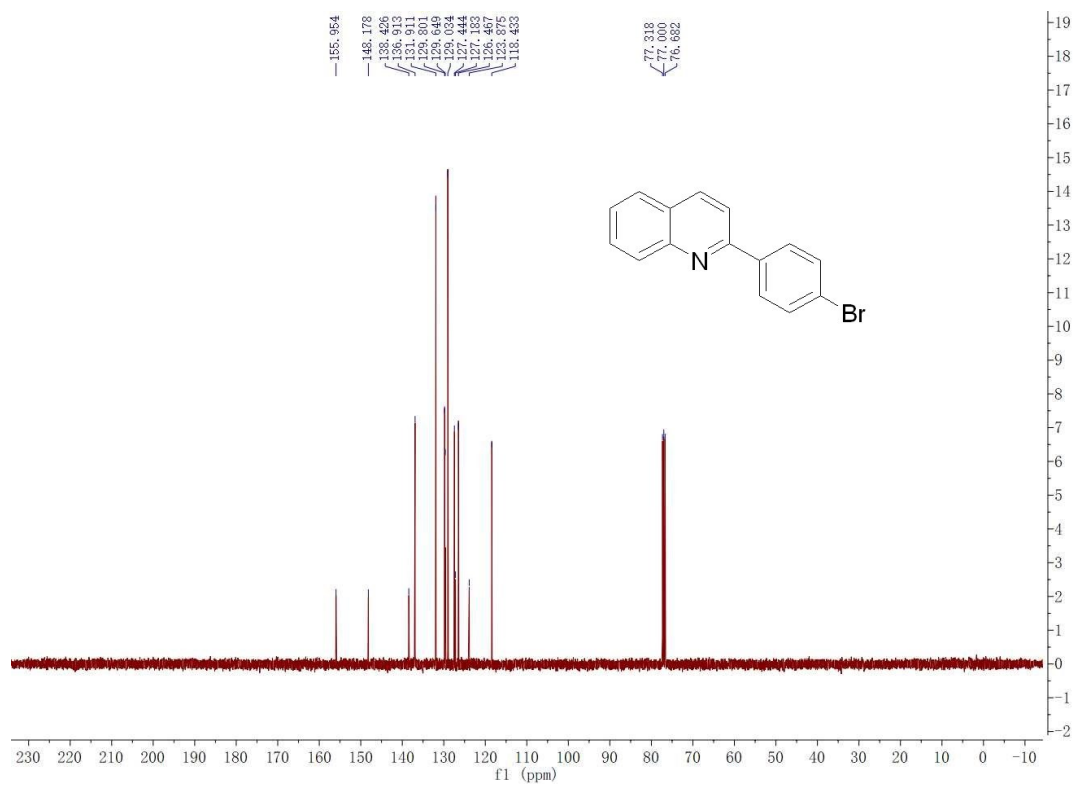



$^1\text{H}$  and  $^{13}\text{C}$  NMR spectra of compound **3ha** in  $\text{CDCl}_3$  (400 MHz)

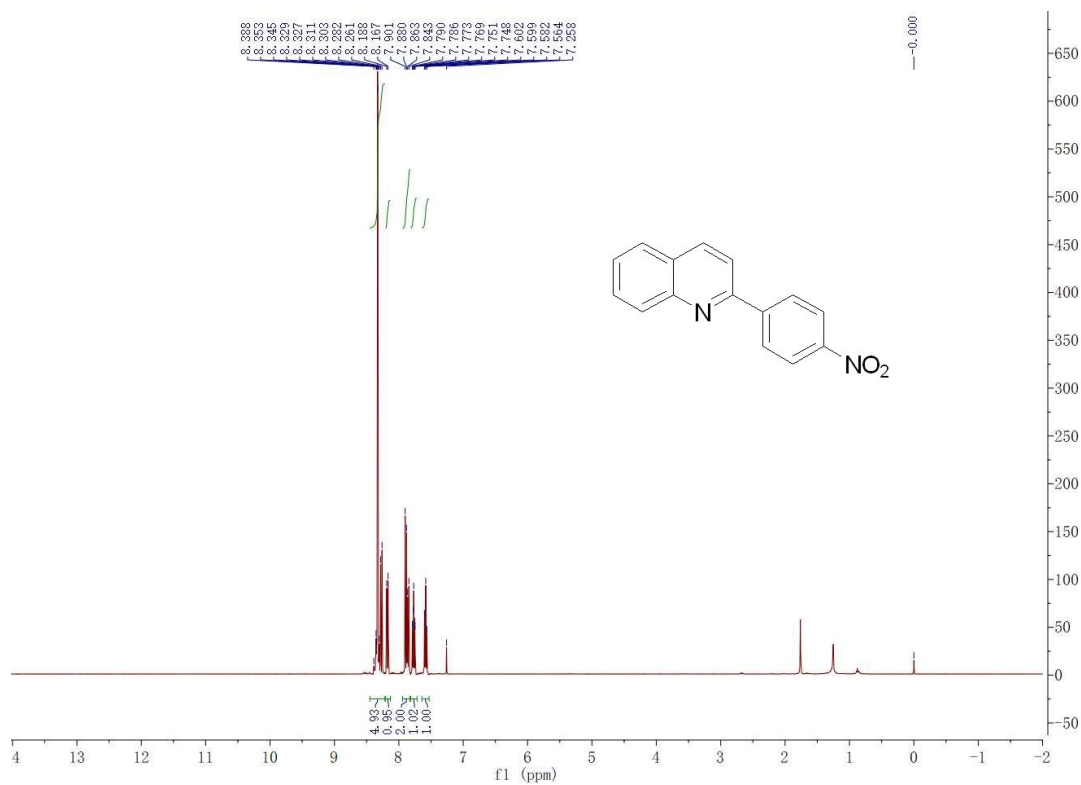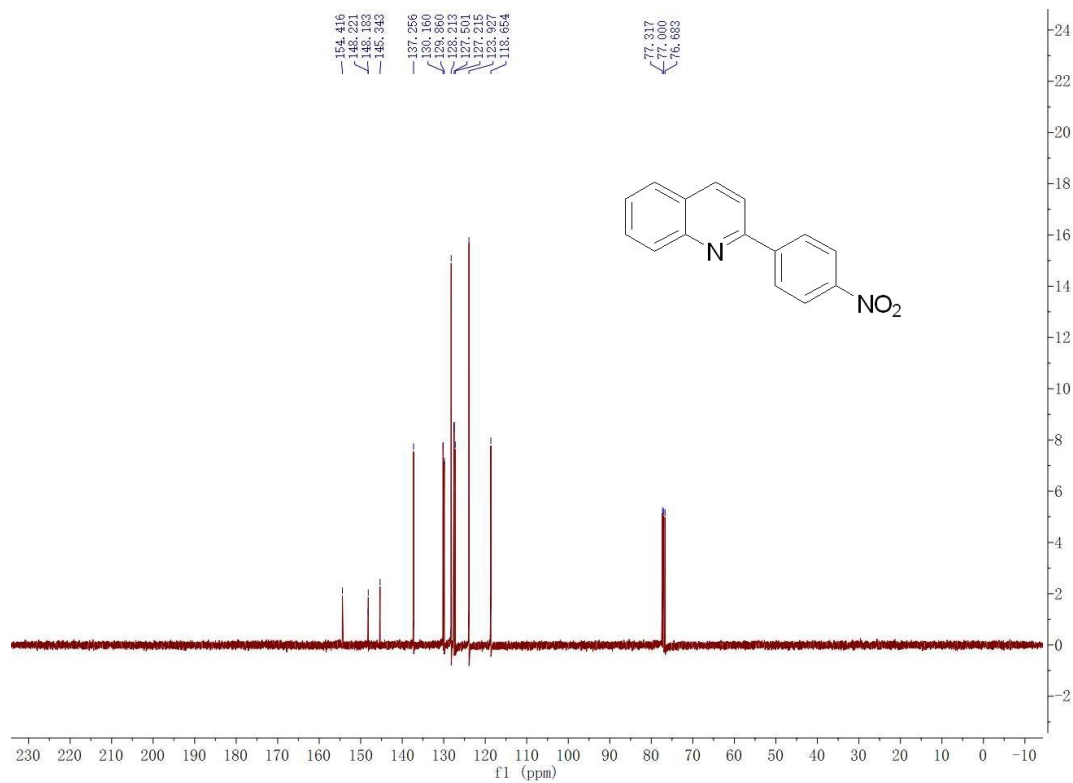

<sup>1</sup>H and <sup>13</sup>C NMR spectra of compound **3ia** in CDCl<sub>3</sub> (400 MHz)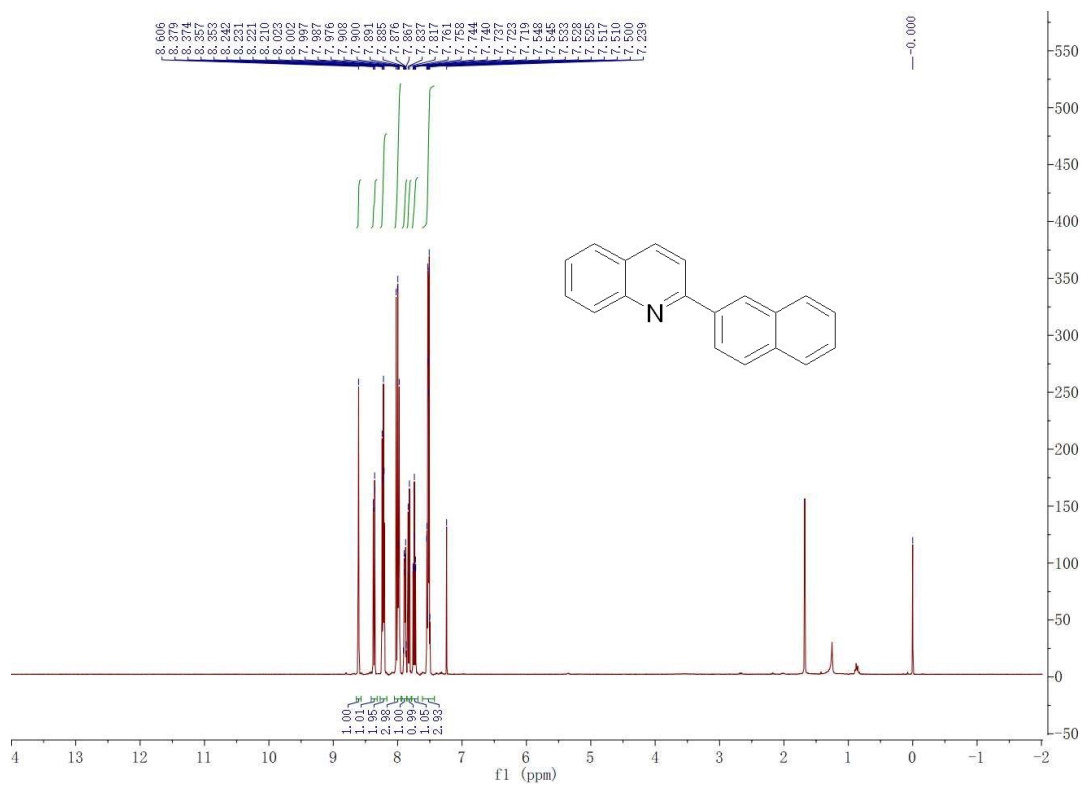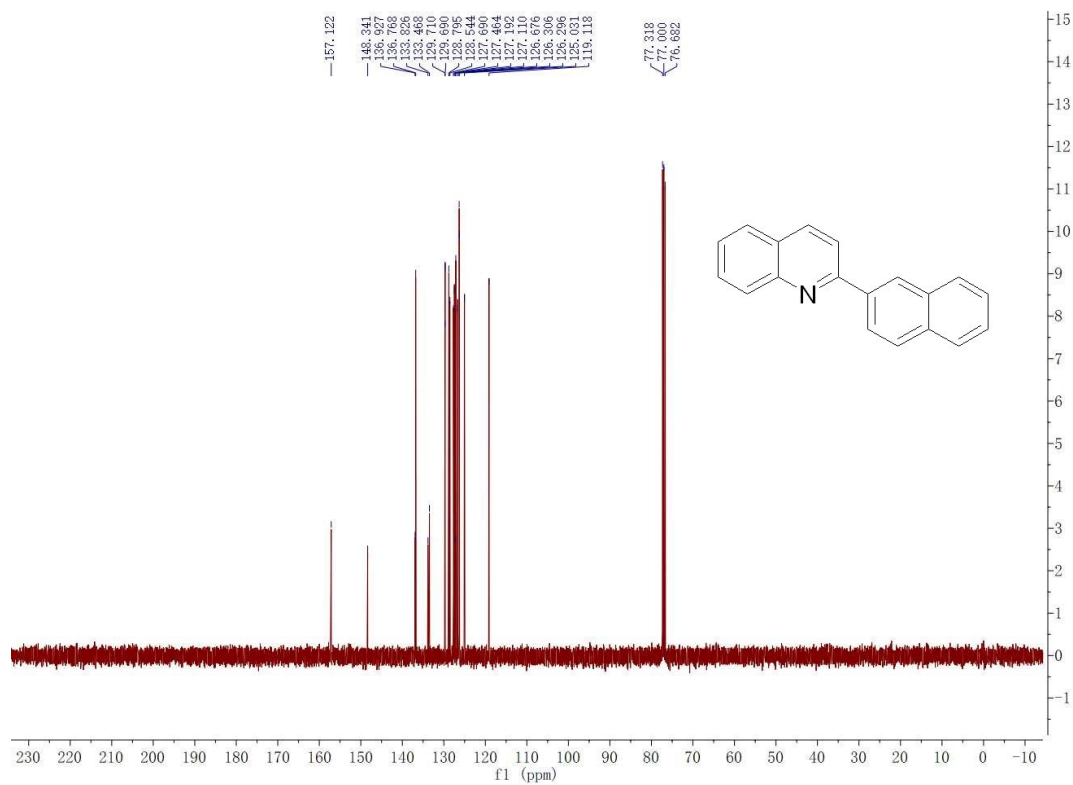

$^1\text{H}$  and  $^{13}\text{C}$  NMR spectra of compound **3ja** in  $\text{CDCl}_3$  (400 MHz)

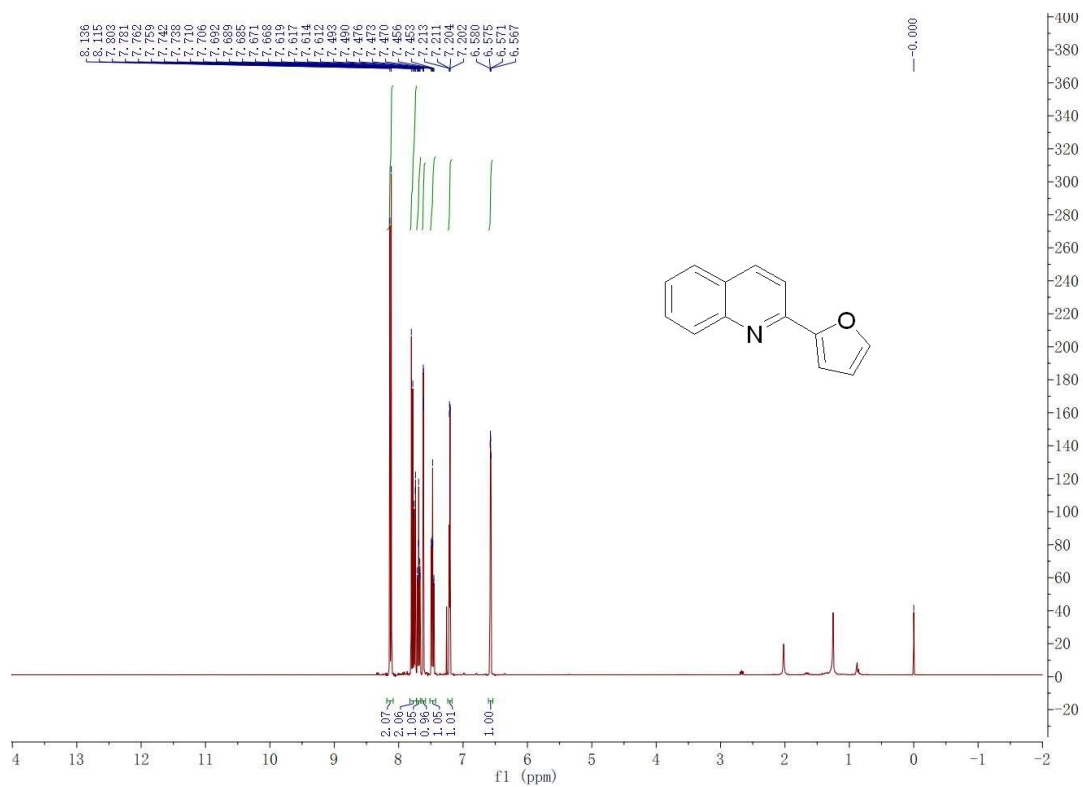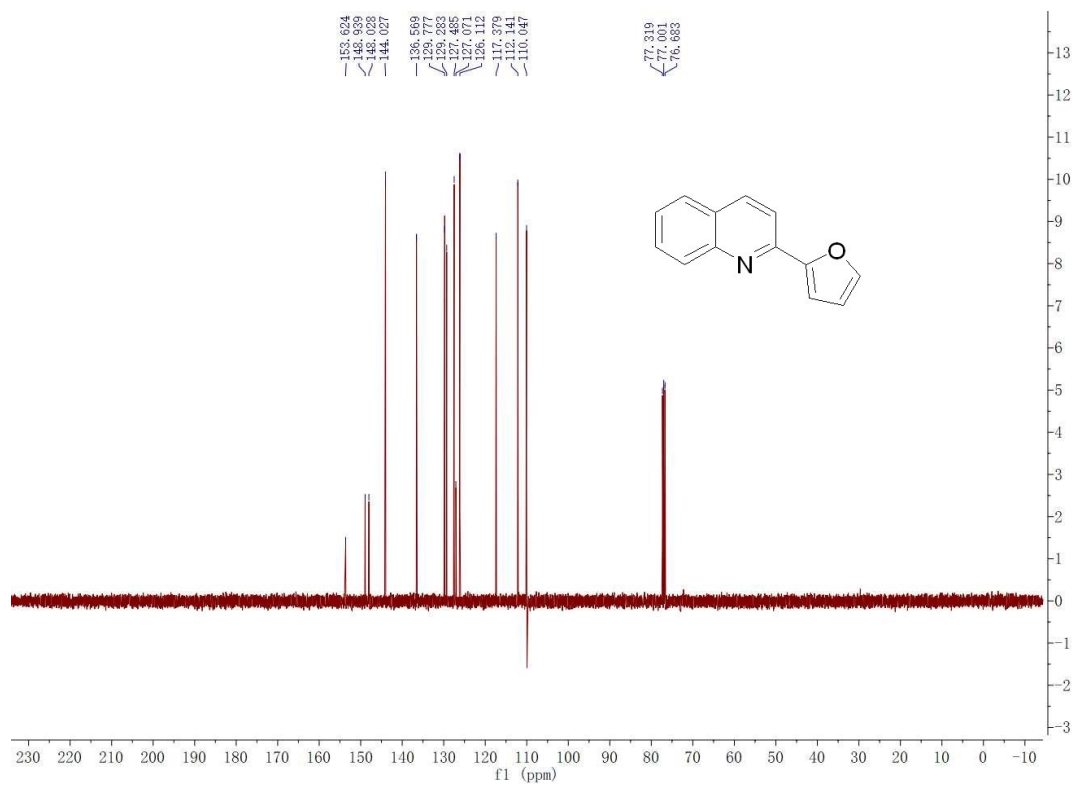

$^1\text{H}$  and  $^{13}\text{C}$  NMR spectra of compound **3ka** in  $\text{CDCl}_3$  (400 MHz)

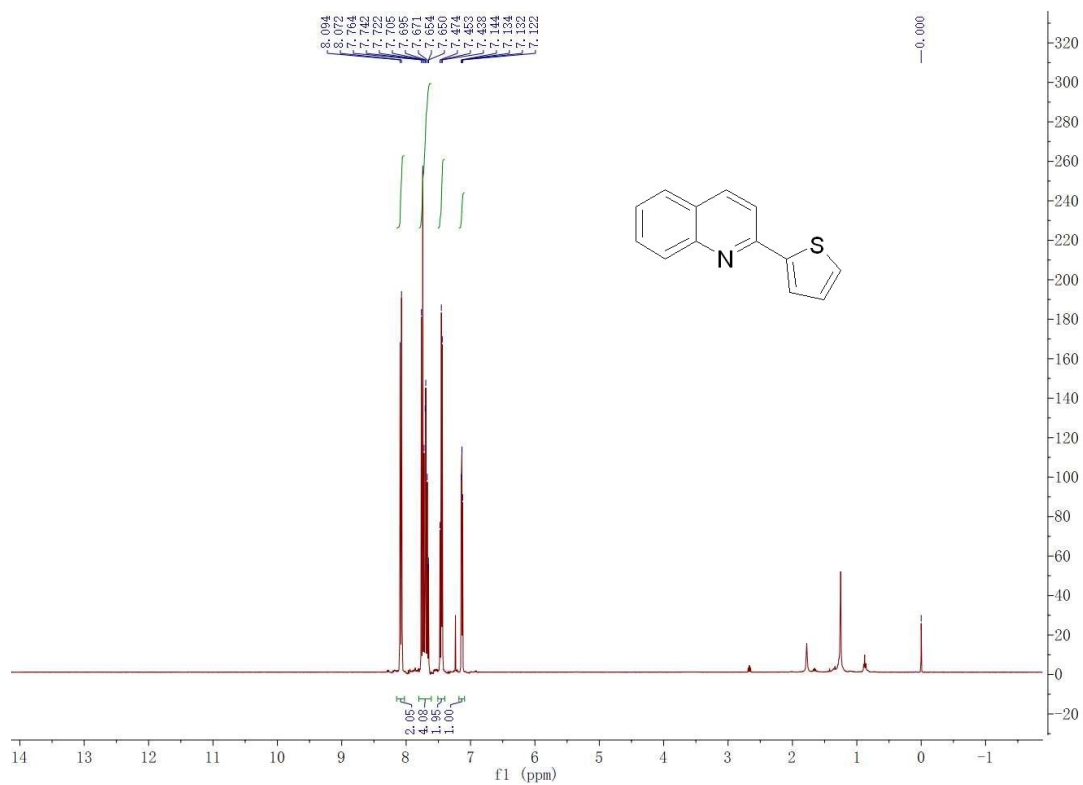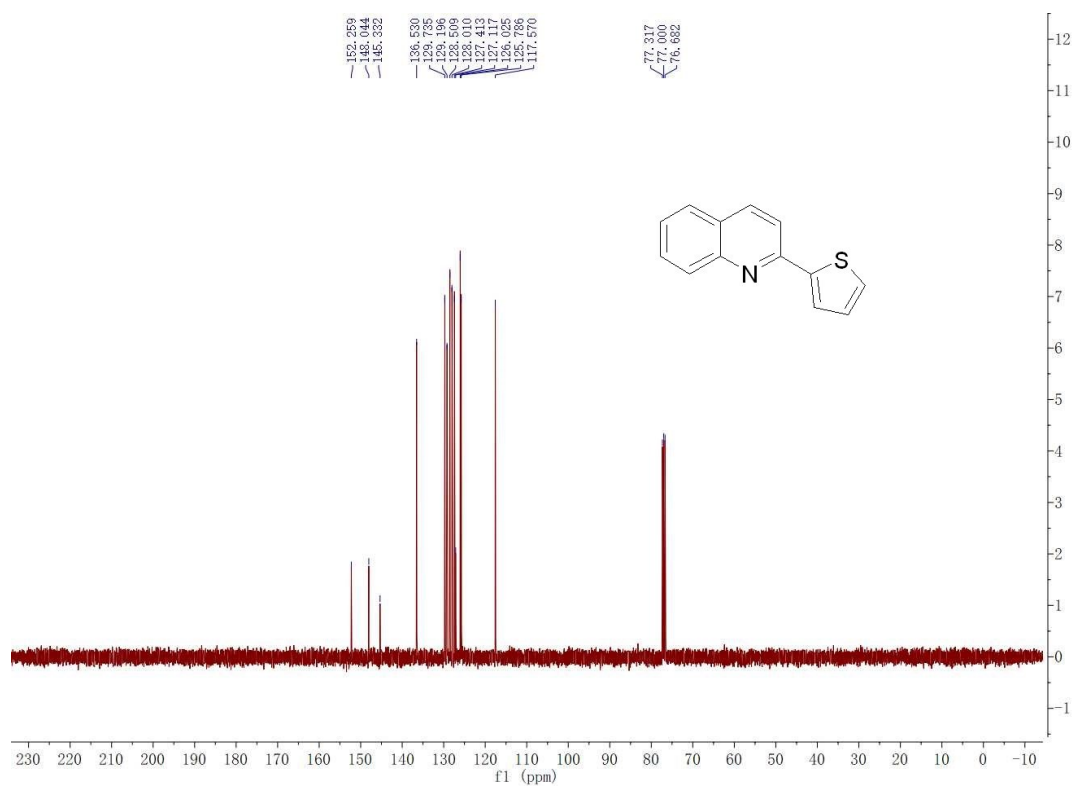

$^1\text{H}$  and  $^{13}\text{C}$  NMR spectra of compound **3la** in  $\text{CDCl}_3$  (400 MHz)

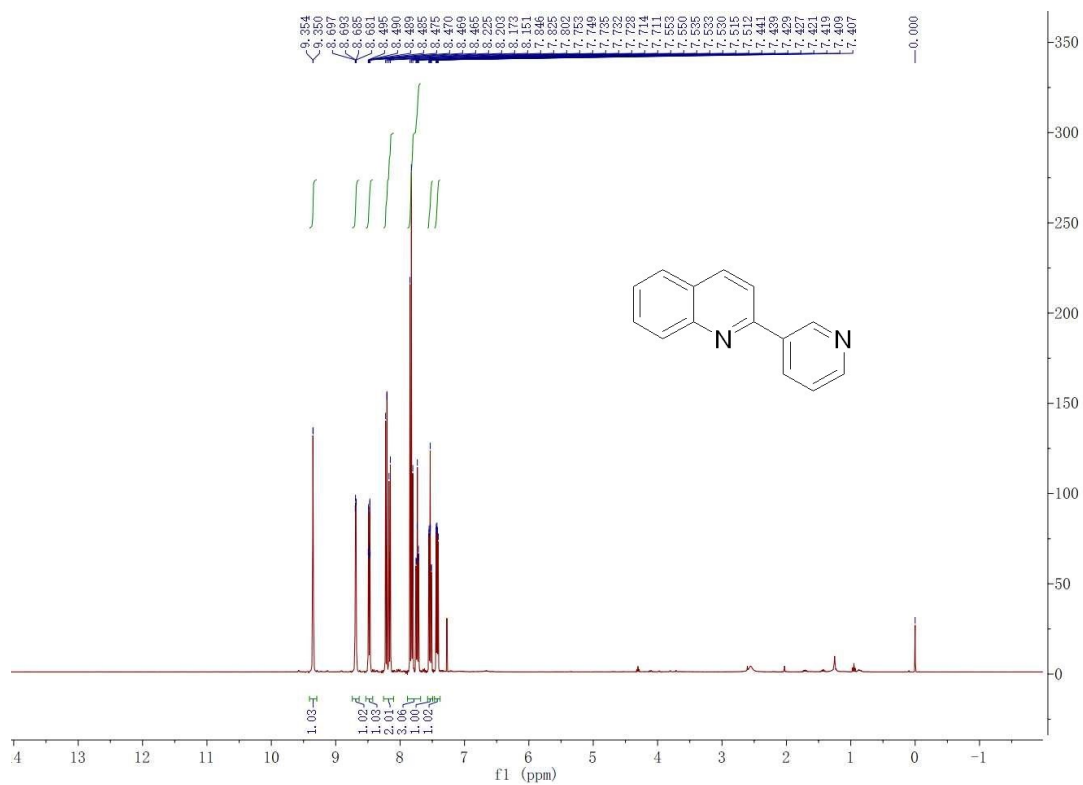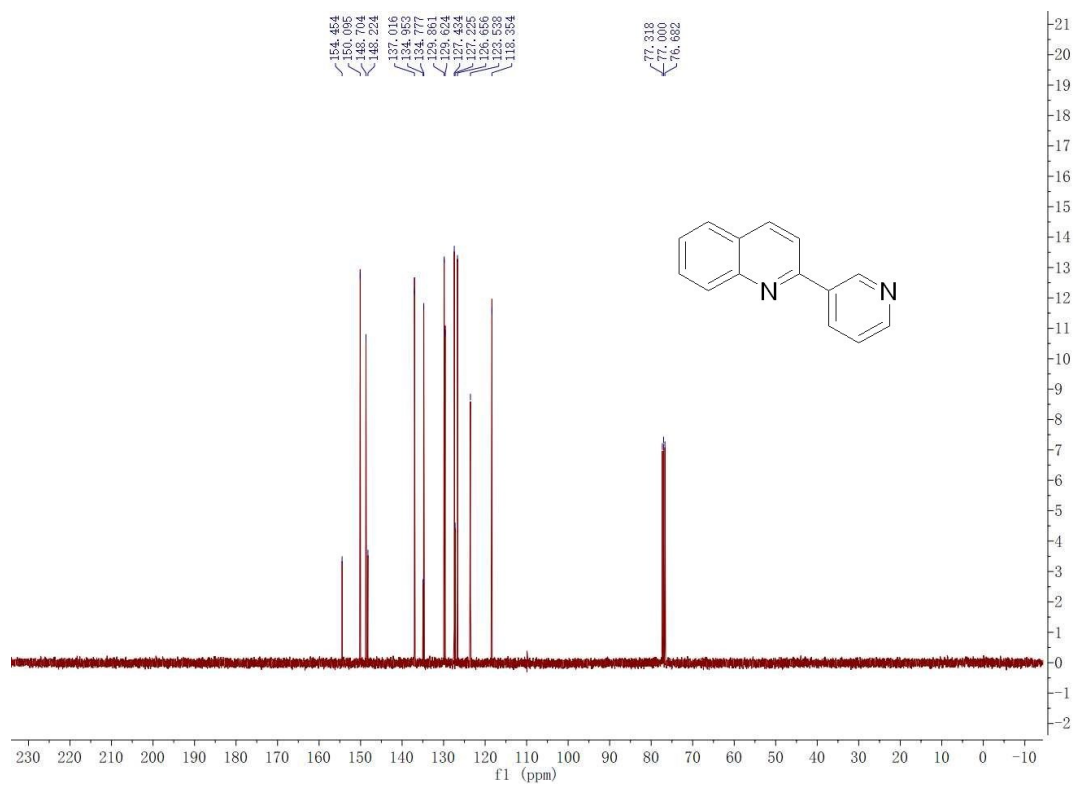

$^1\text{H}$  and  $^{13}\text{C}$  NMR spectra of compound **3ma** in  $\text{CDCl}_3$  (400 MHz)

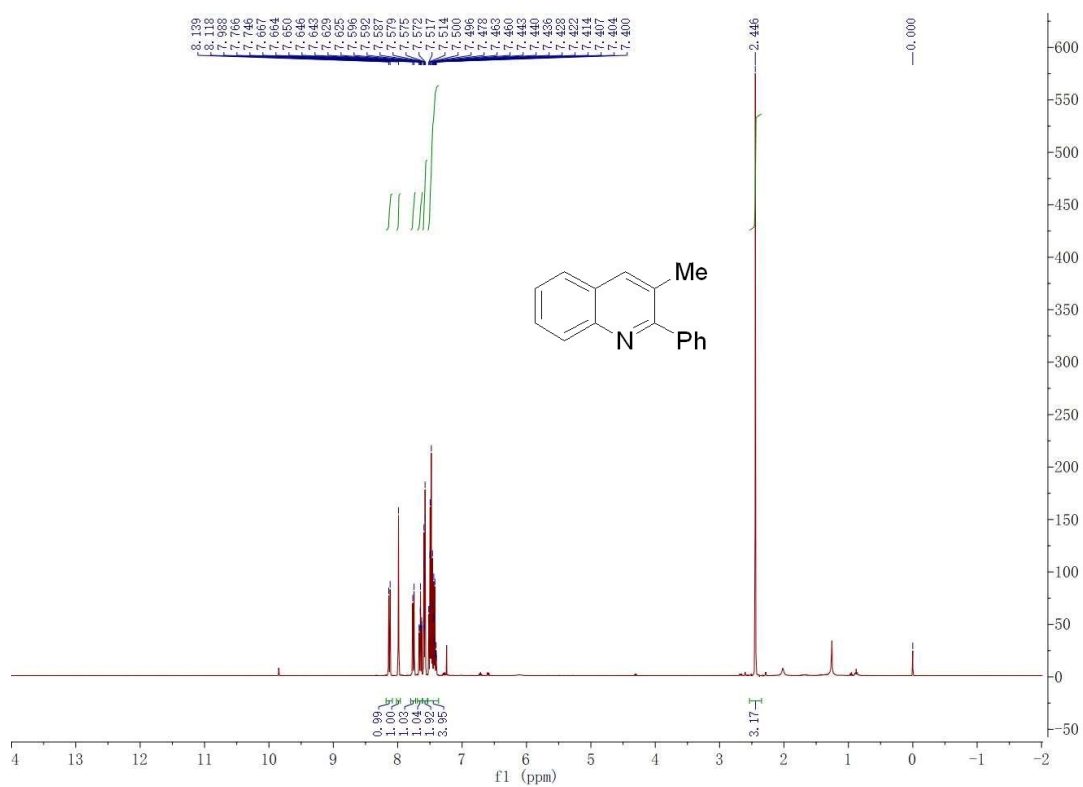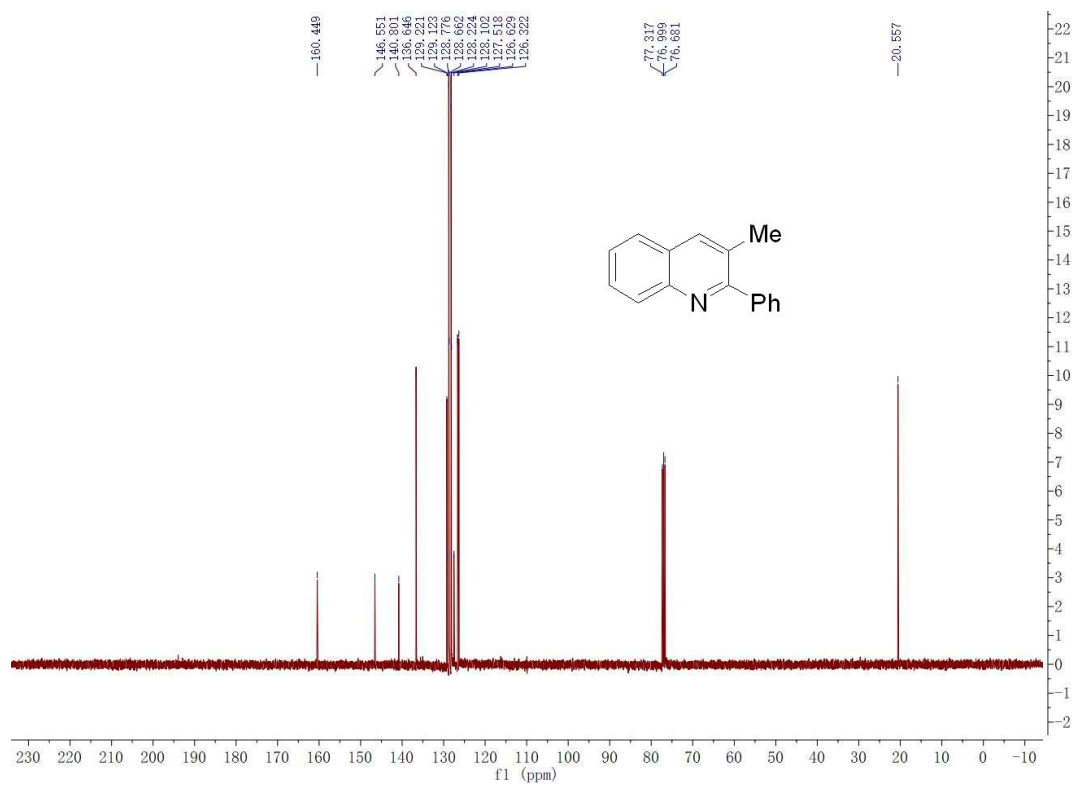

$^1\text{H}$  and  $^{13}\text{C}$  NMR spectra of compound **3na** in  $\text{CDCl}_3$  (400 MHz)

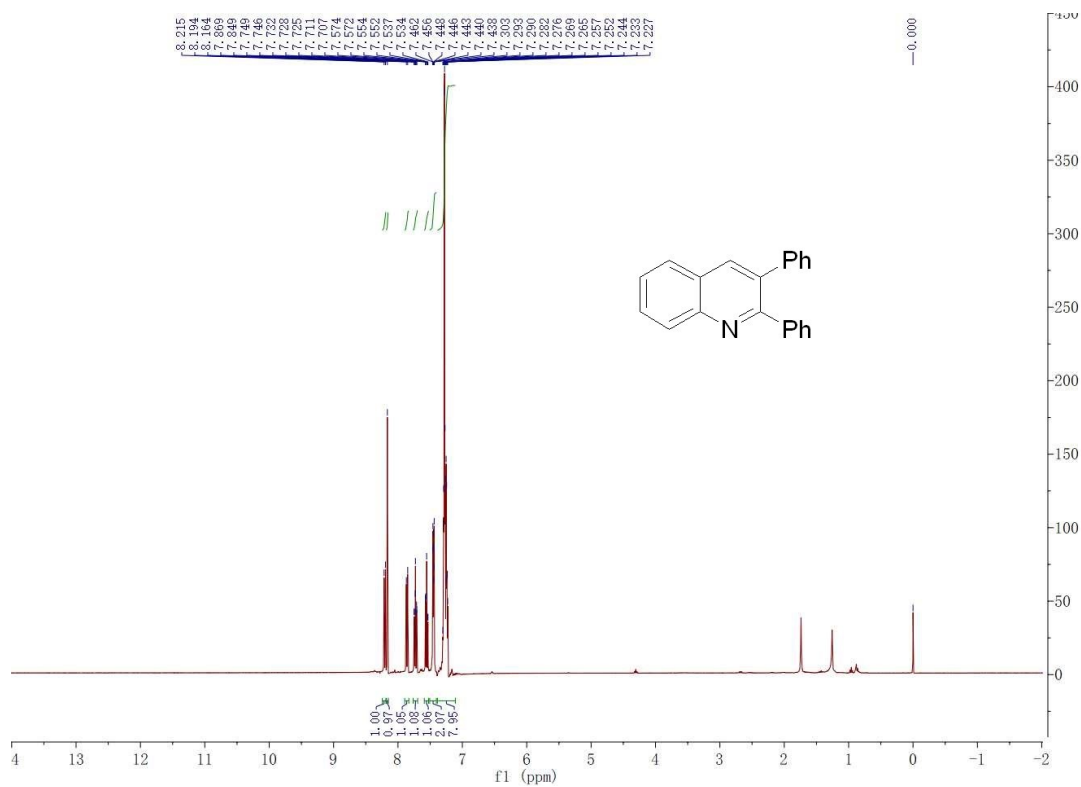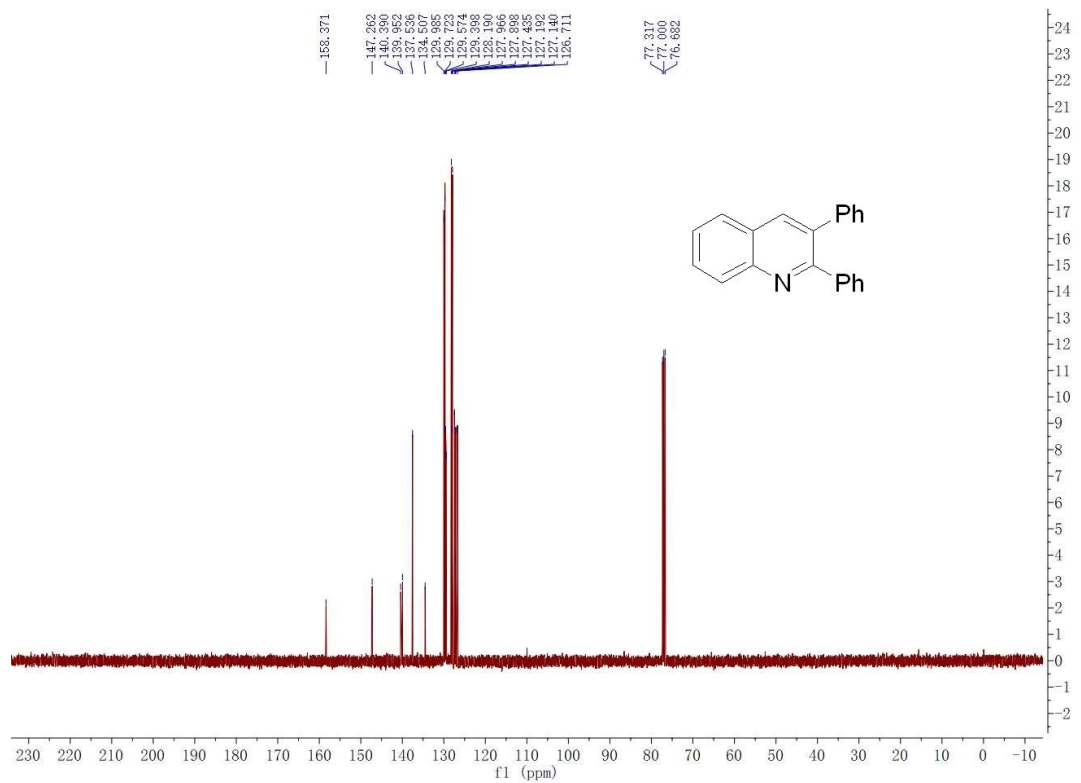

$^1\text{H}$  and  $^{13}\text{C}$  NMR spectra of compound **30a** in  $\text{CDCl}_3$  (400 MHz)

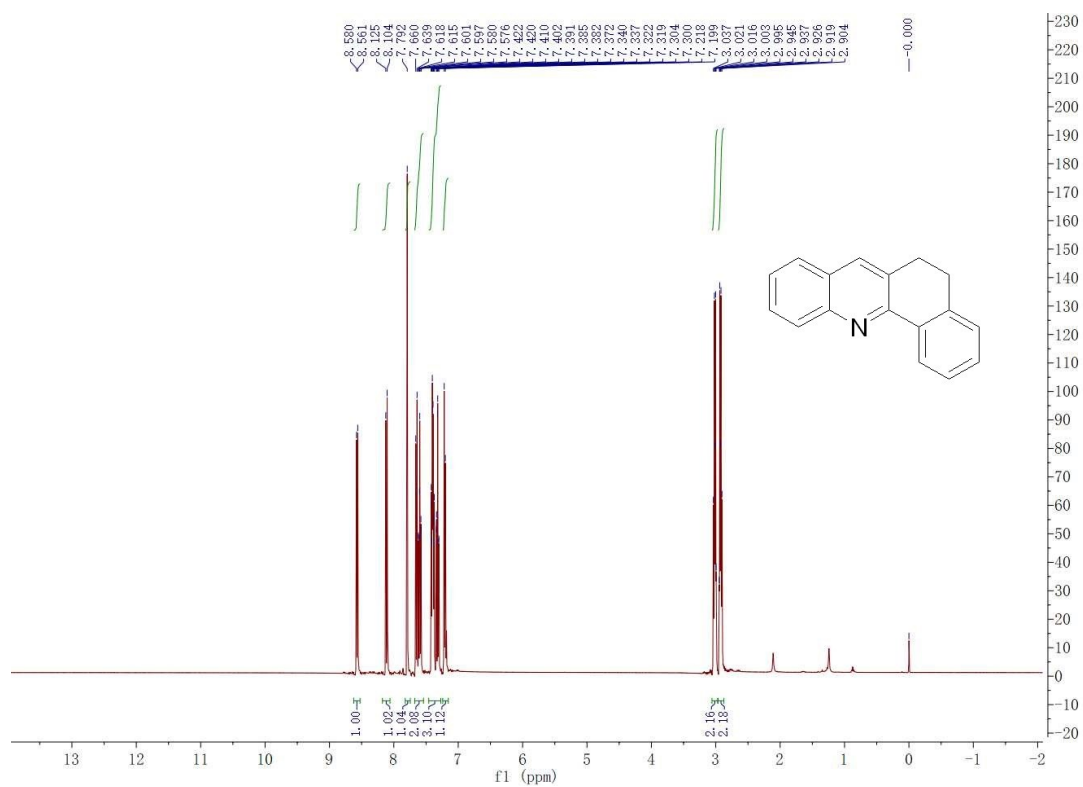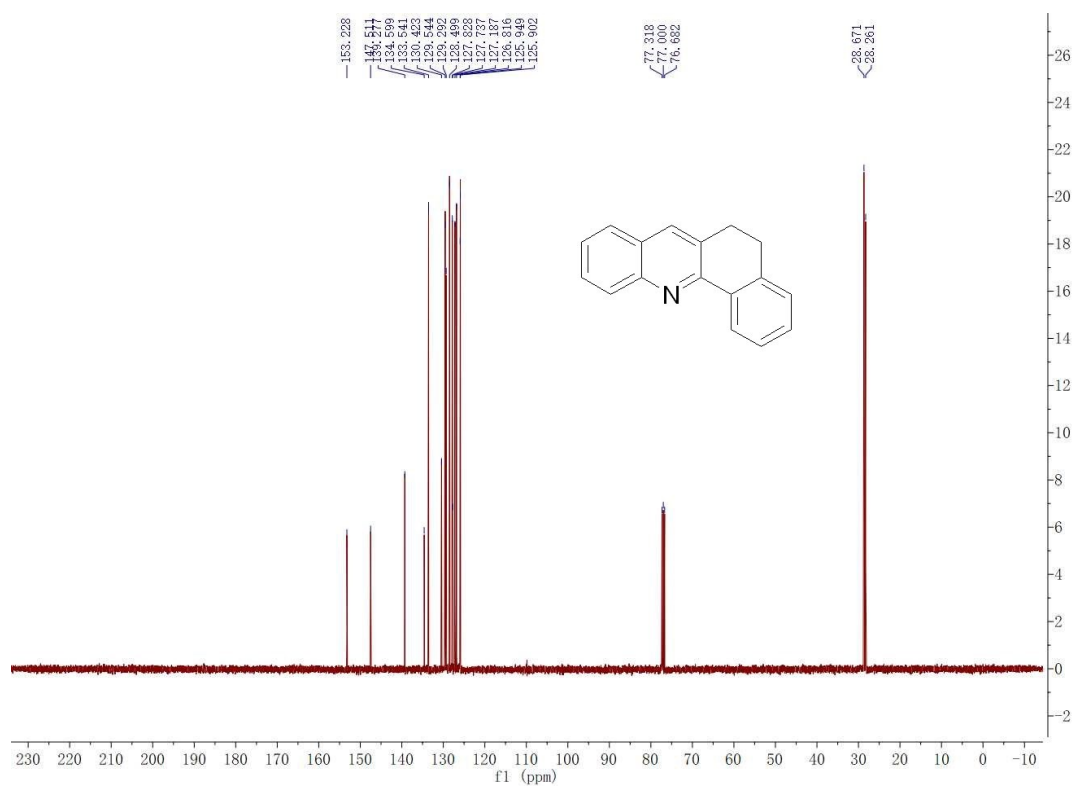



$^1\text{H}$  and  $^{13}\text{C}$  NMR spectra of compound **3pa** in  $\text{CDCl}_3$  (400 MHz)

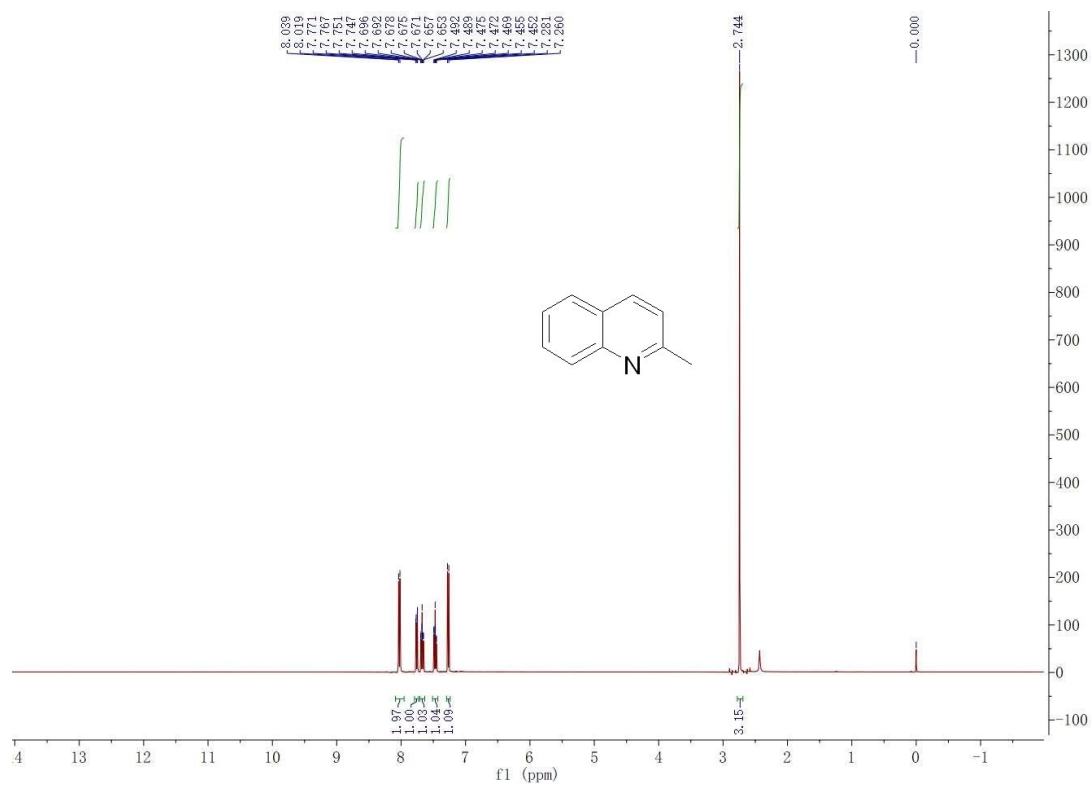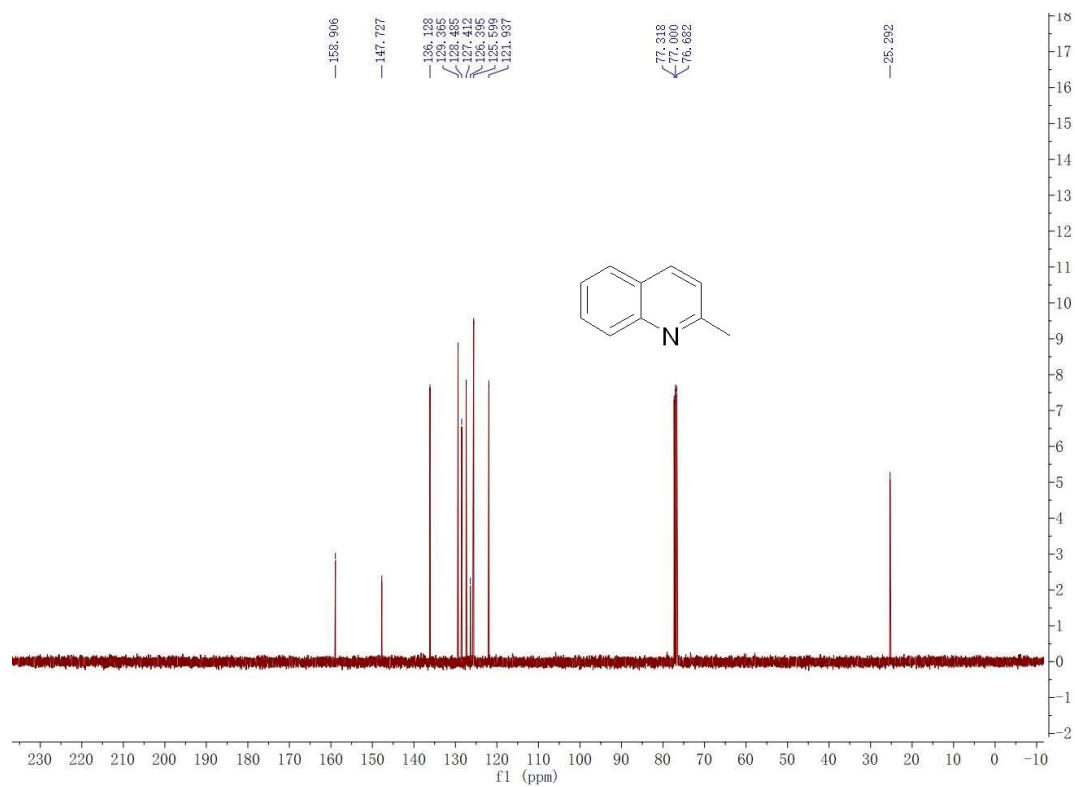

$^1\text{H}$  and  $^{13}\text{C}$  NMR spectra of compound **3qa** in  $\text{CDCl}_3$  (400 MHz)

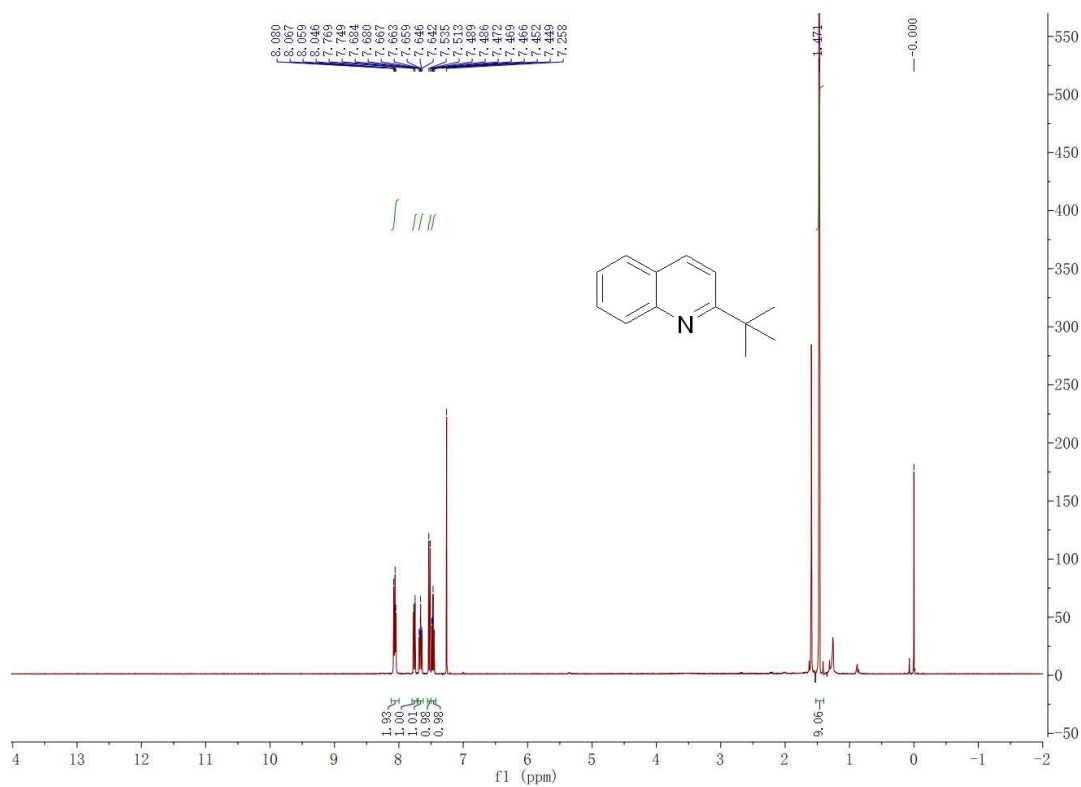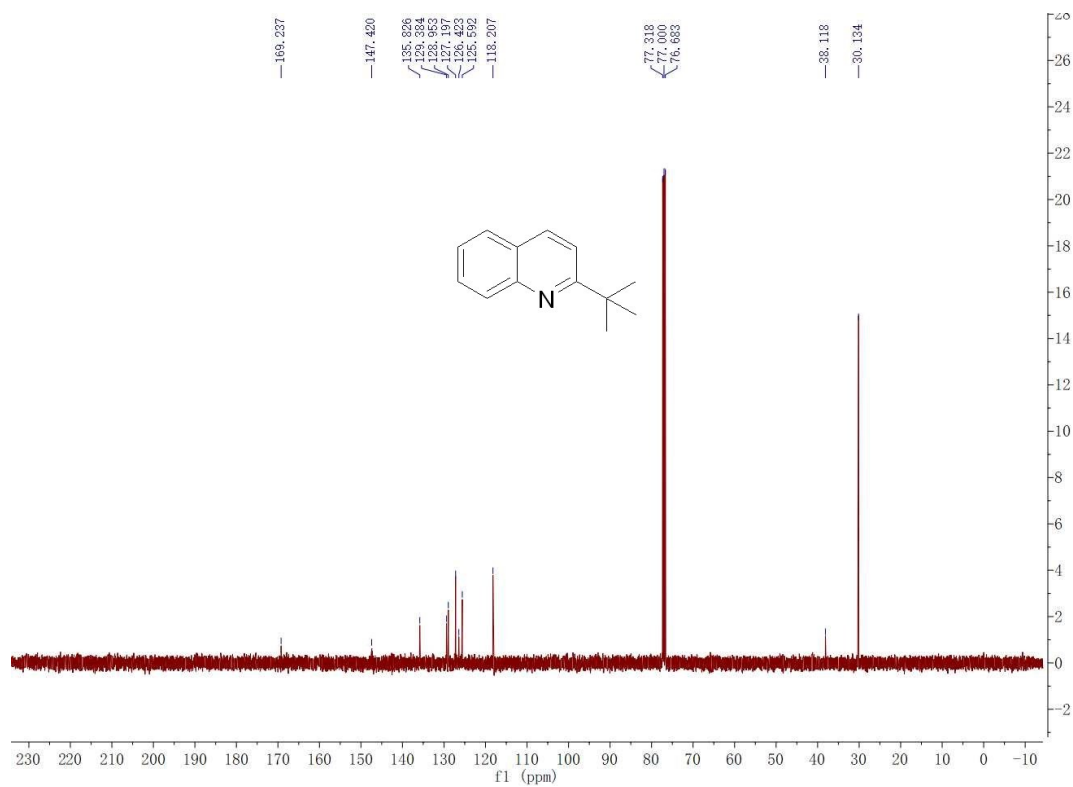

$^1\text{H}$  and  $^{13}\text{C}$  NMR spectra of compound **3ra** in  $\text{CDCl}_3$  (400 MHz)

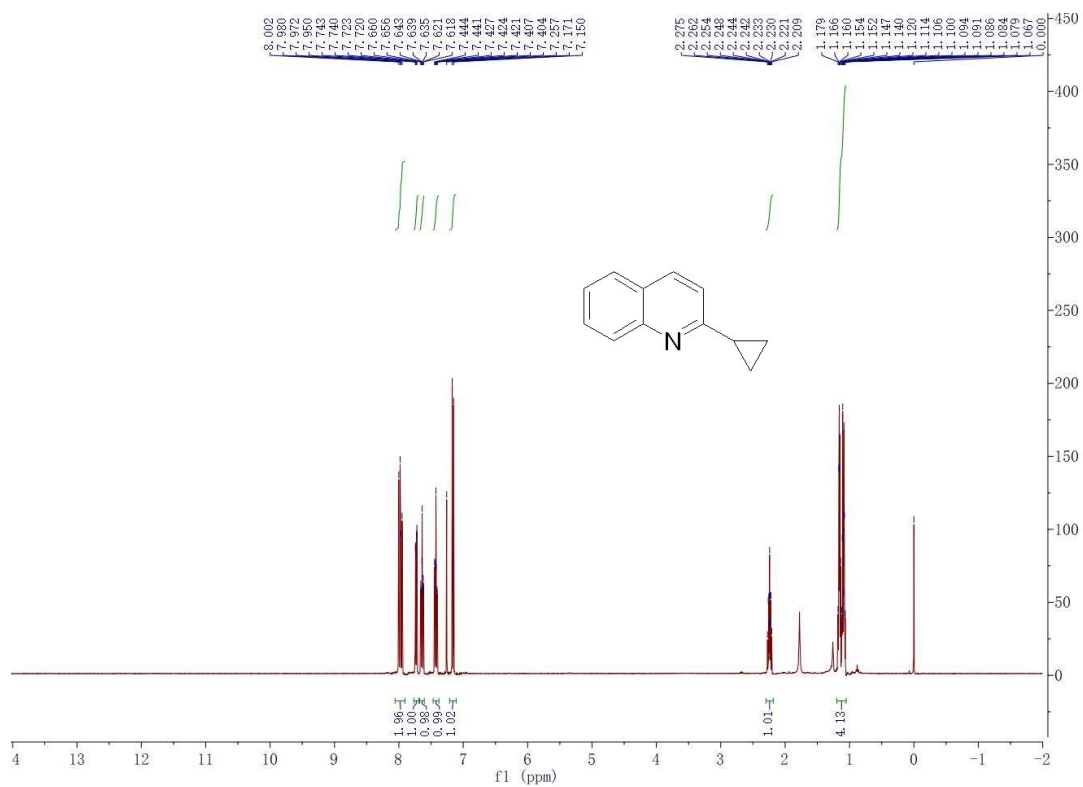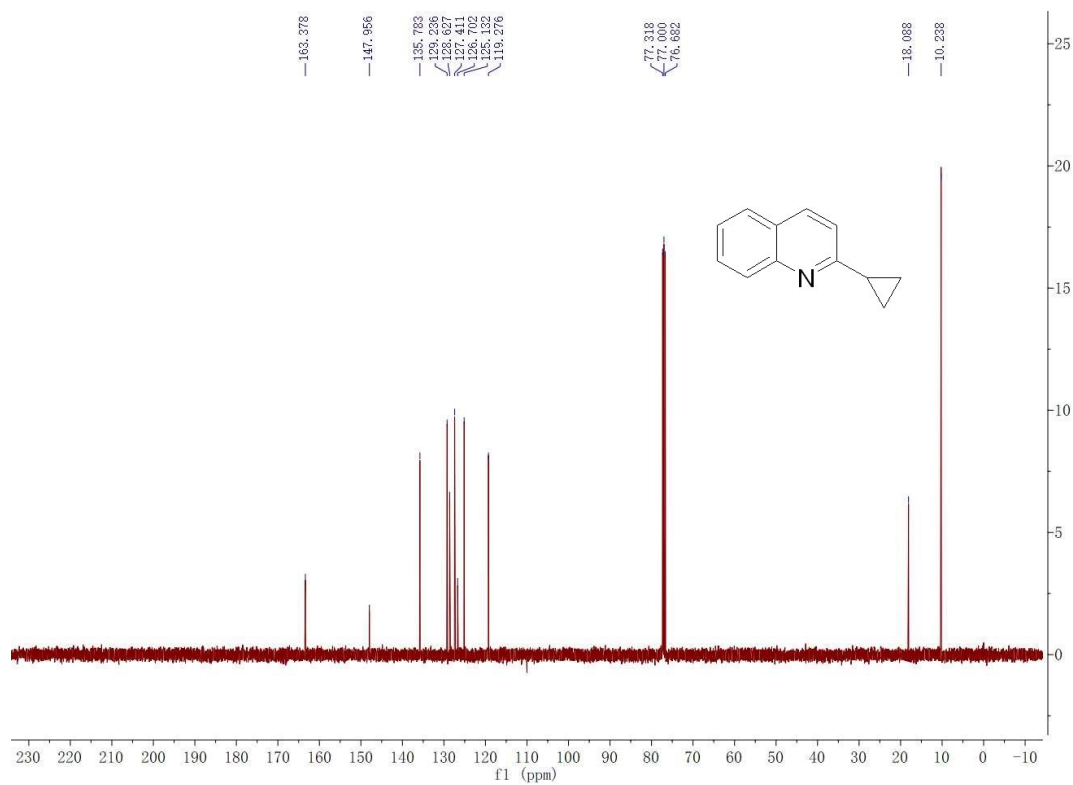

$^1\text{H}$  and  $^{13}\text{C}$  NMR spectra of compound **3sa** in  $\text{CDCl}_3$  (400 MHz)

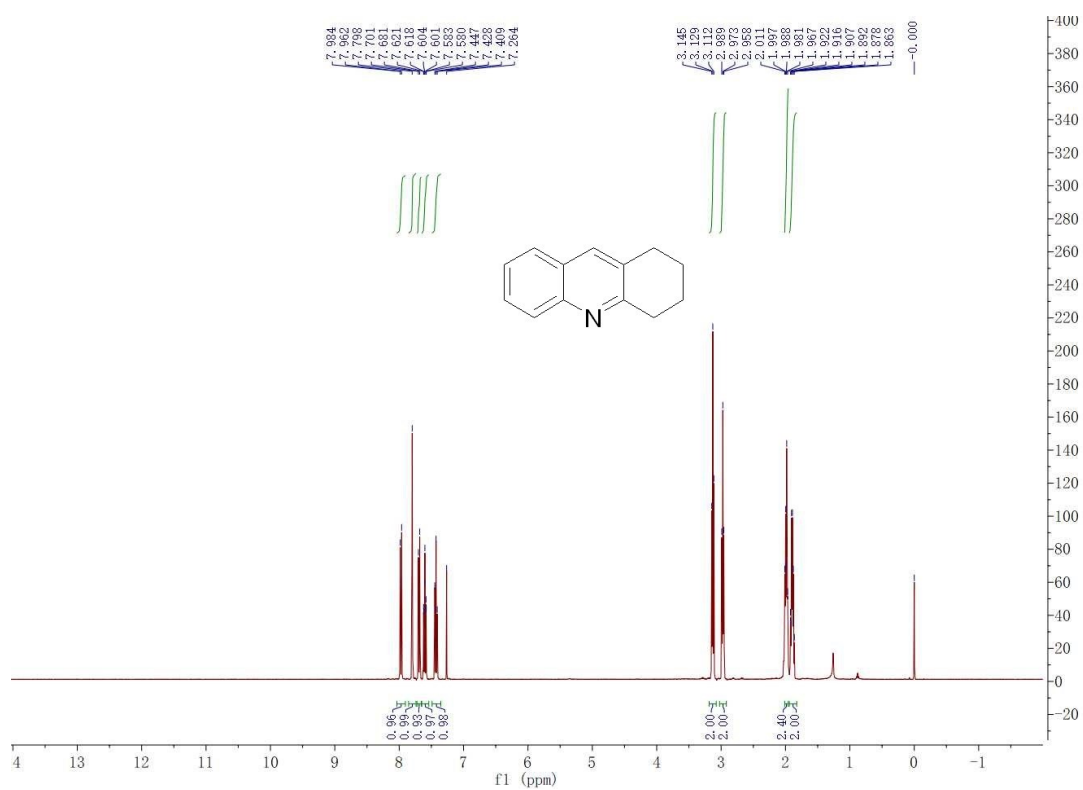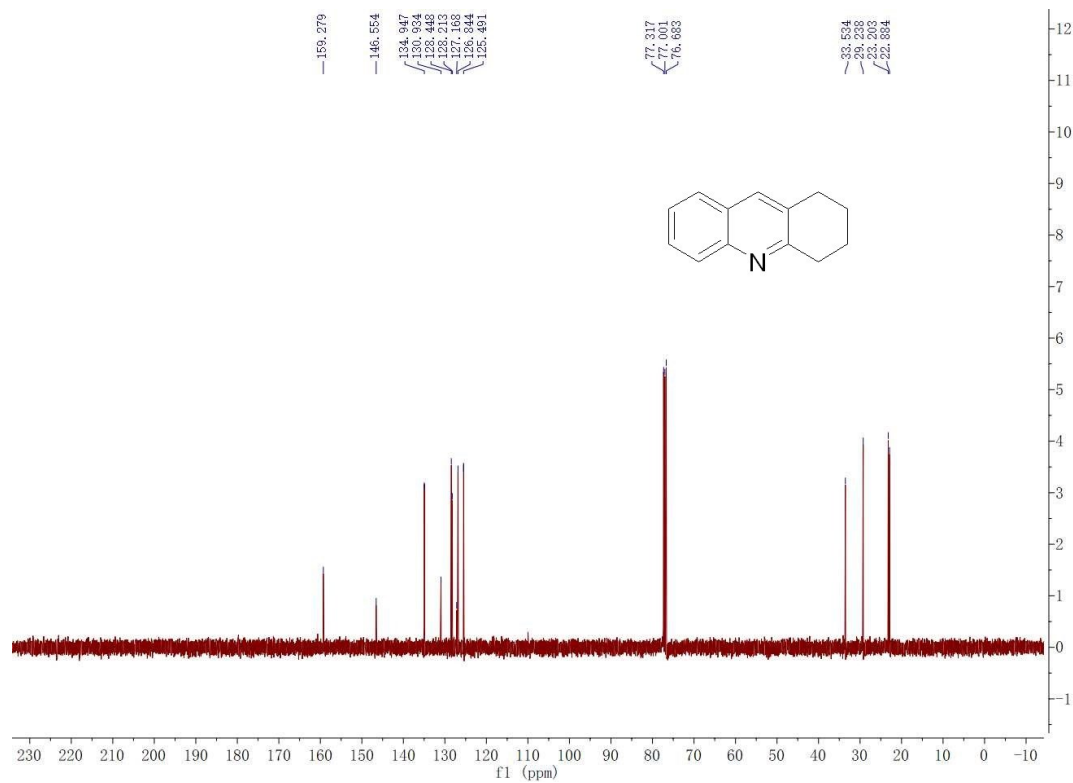

$^1\text{H}$  and  $^{13}\text{C}$  NMR spectra of compound **3ta** in  $\text{CDCl}_3$  (400 MHz)

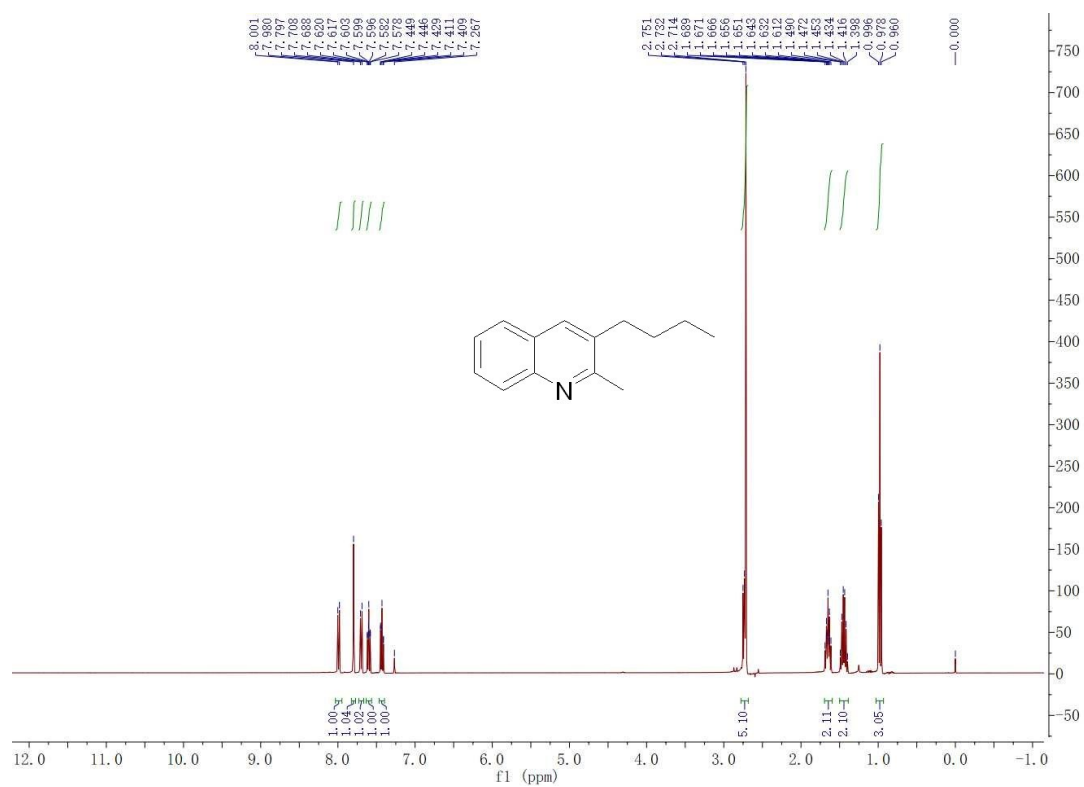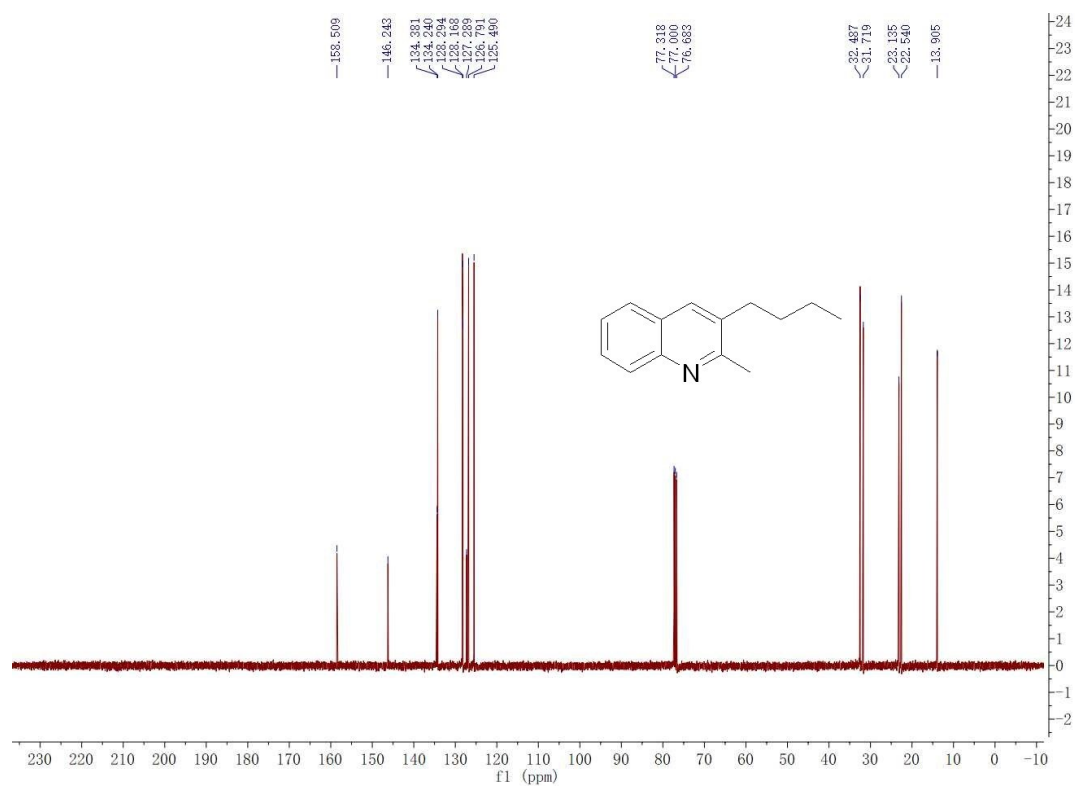

$^1\text{H}$  and  $^{13}\text{C}$  NMR spectra of compound **3ta'** in  $\text{CDCl}_3$  (400 MHz)

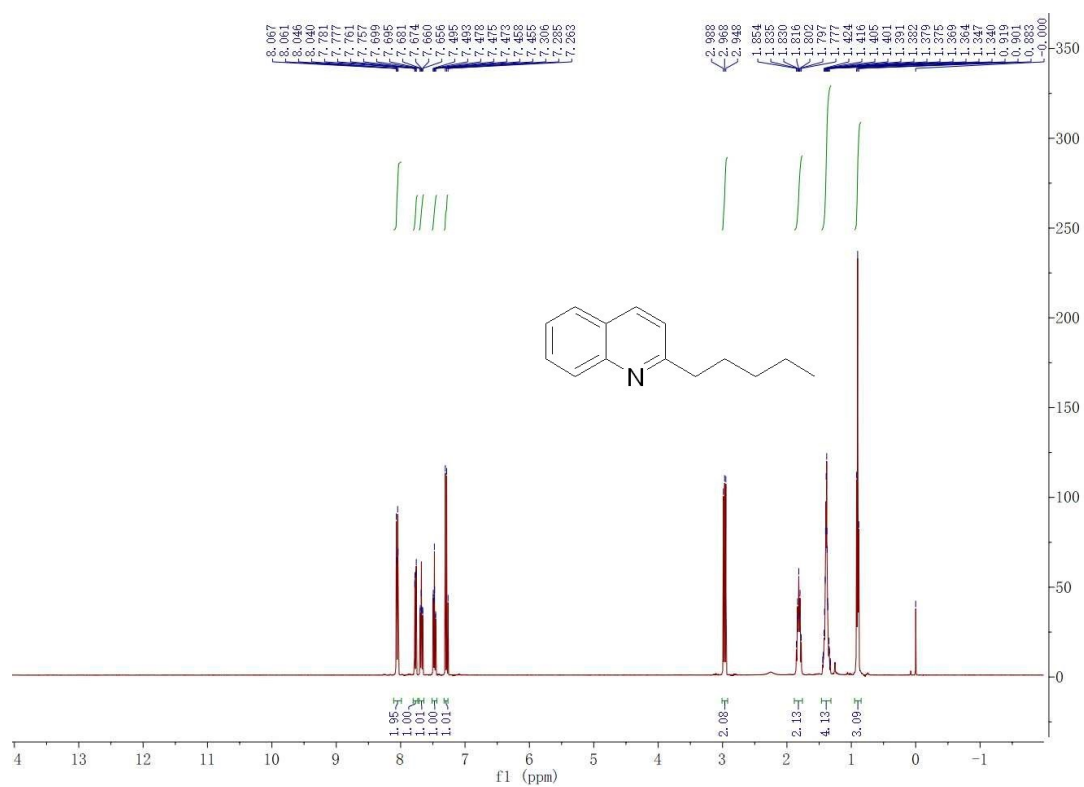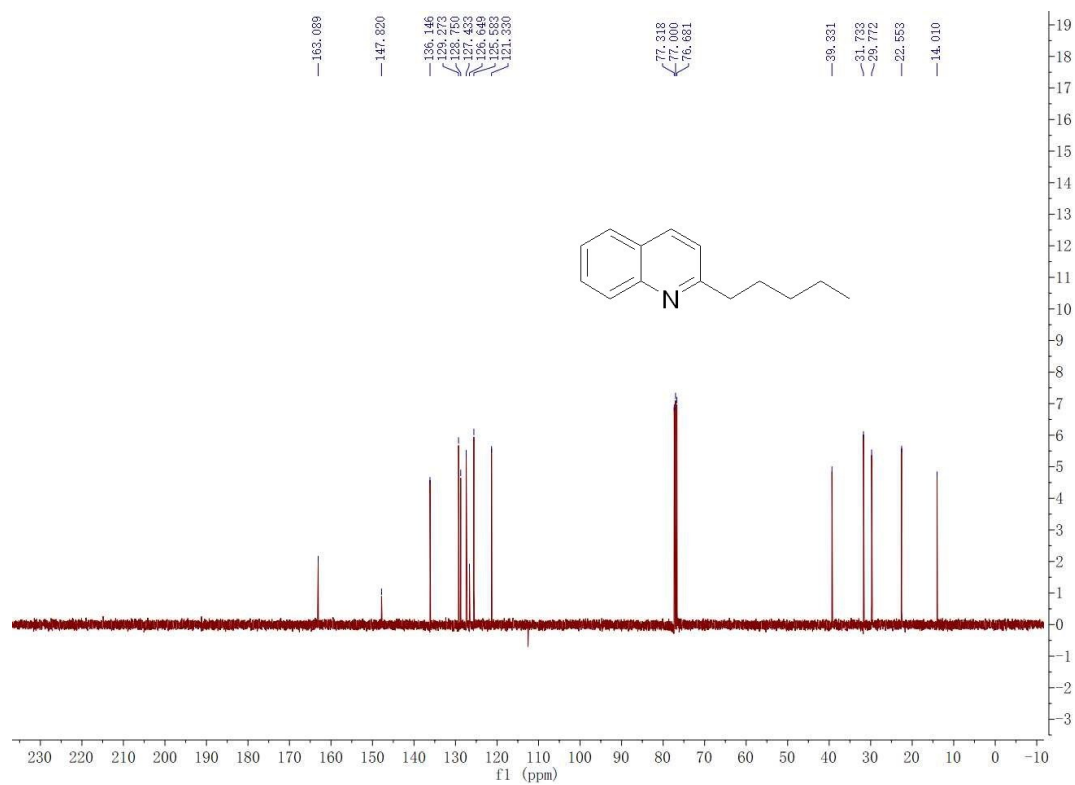

$^1\text{H}$  and  $^{13}\text{C}$  NMR spectra of compound **3ab** in  $\text{CDCl}_3$  (400 MHz)

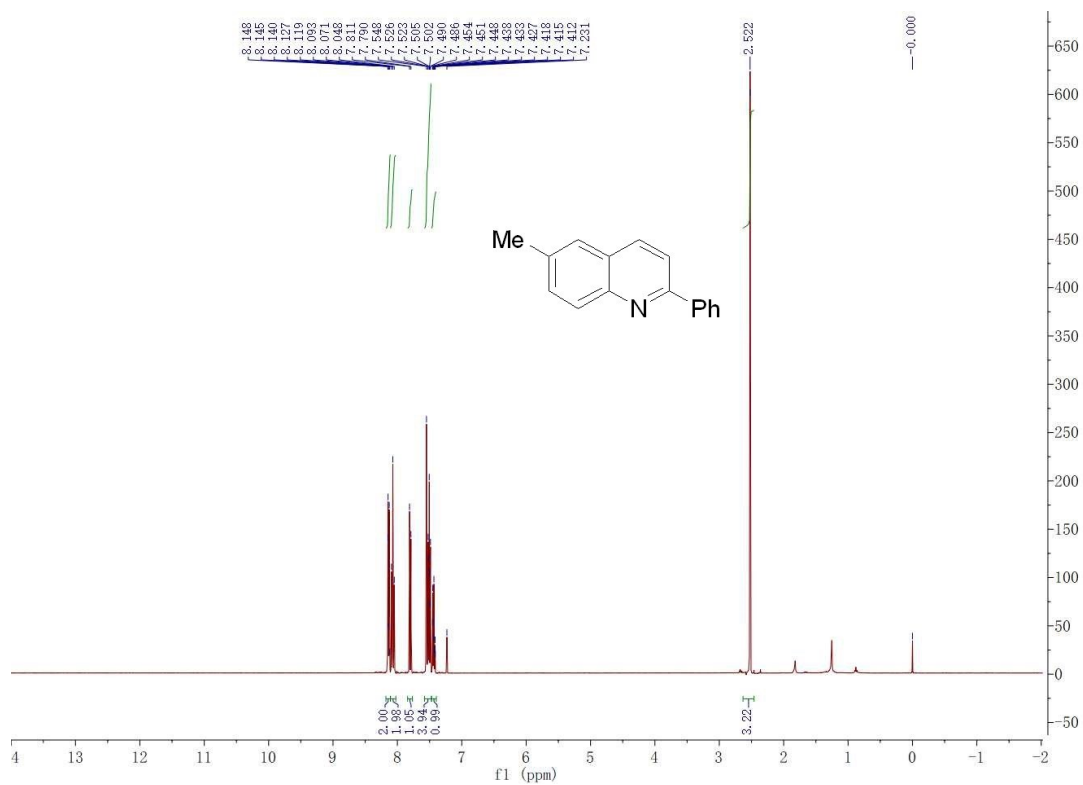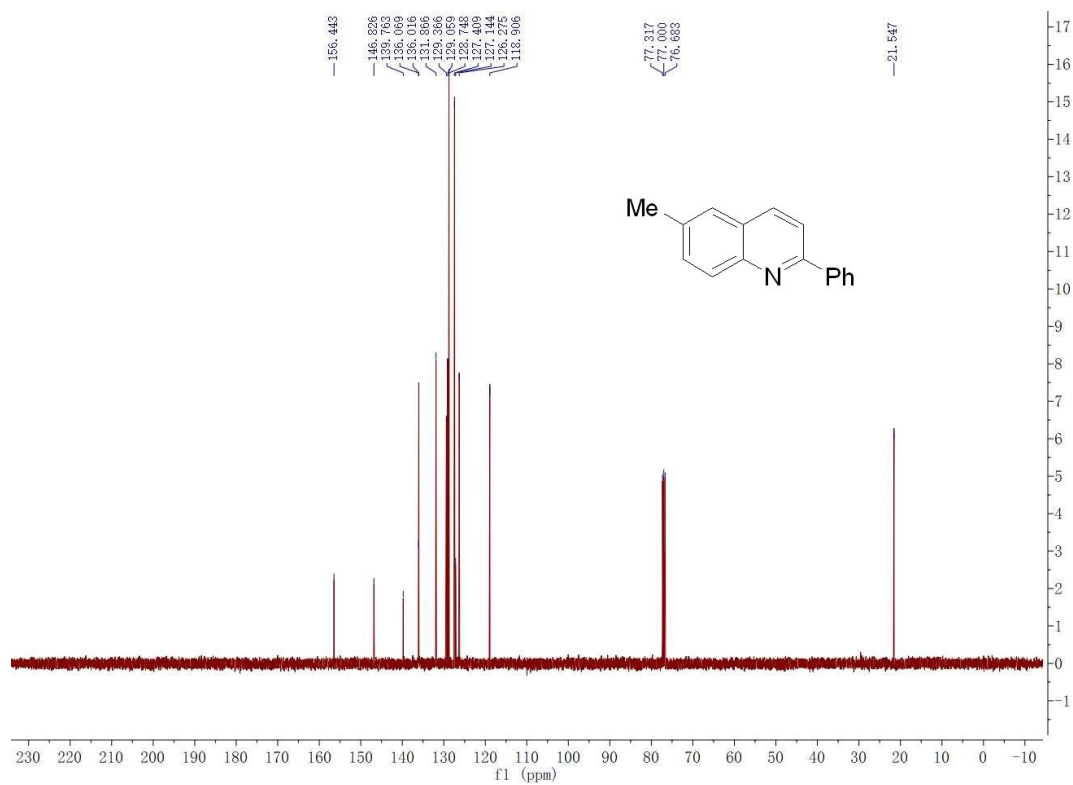

$^1\text{H}$  and  $^{13}\text{C}$  NMR spectra of compound **3ac** in  $\text{CDCl}_3$  (400 MHz)

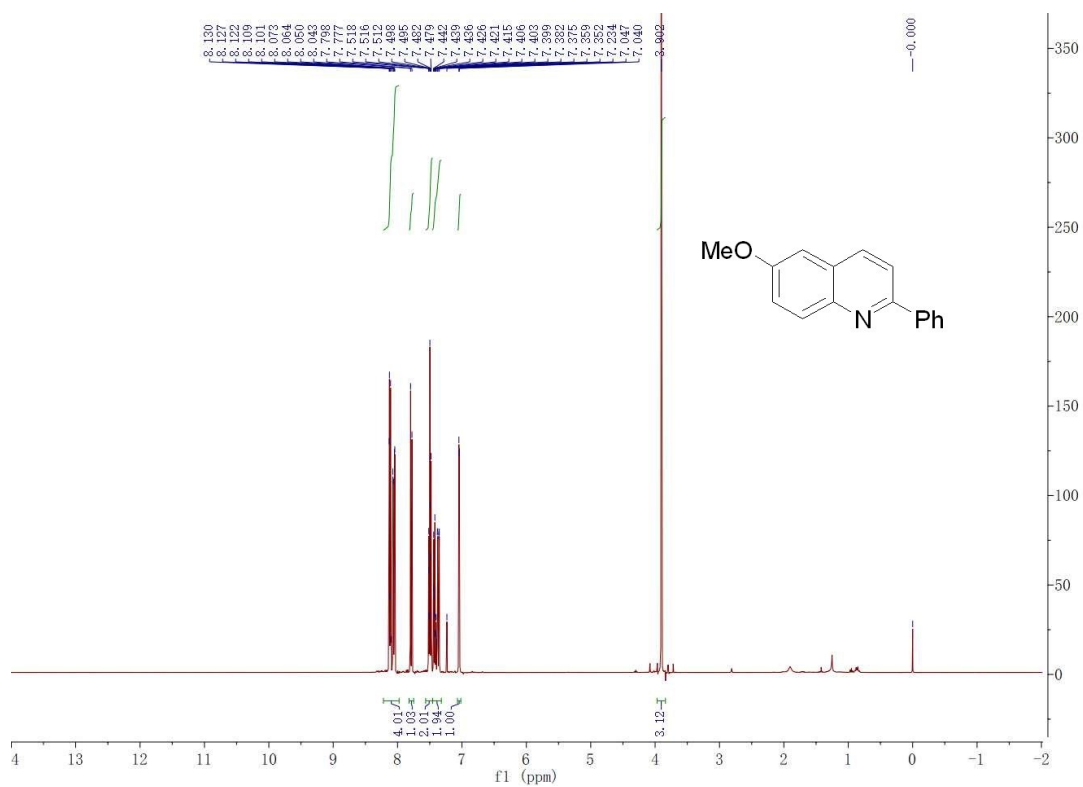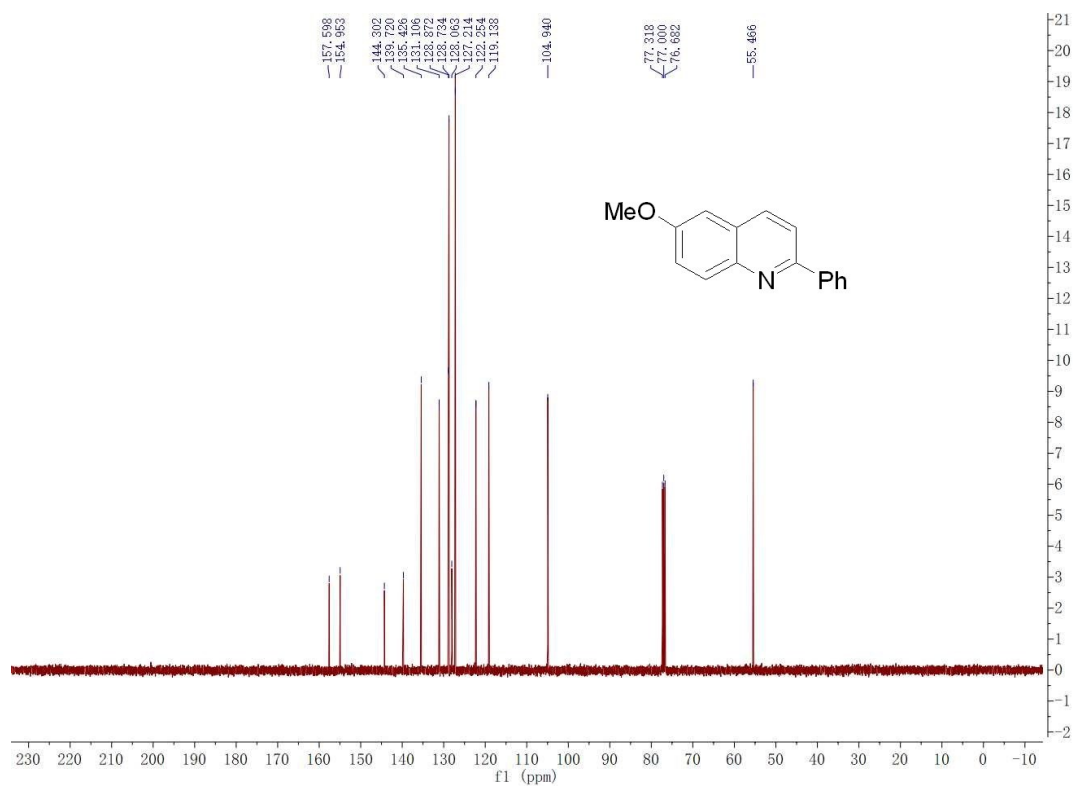



$^1\text{H}$  and  $^{13}\text{C}$  NMR spectra of compound **3ad** in  $\text{CDCl}_3$  (400 MHz)

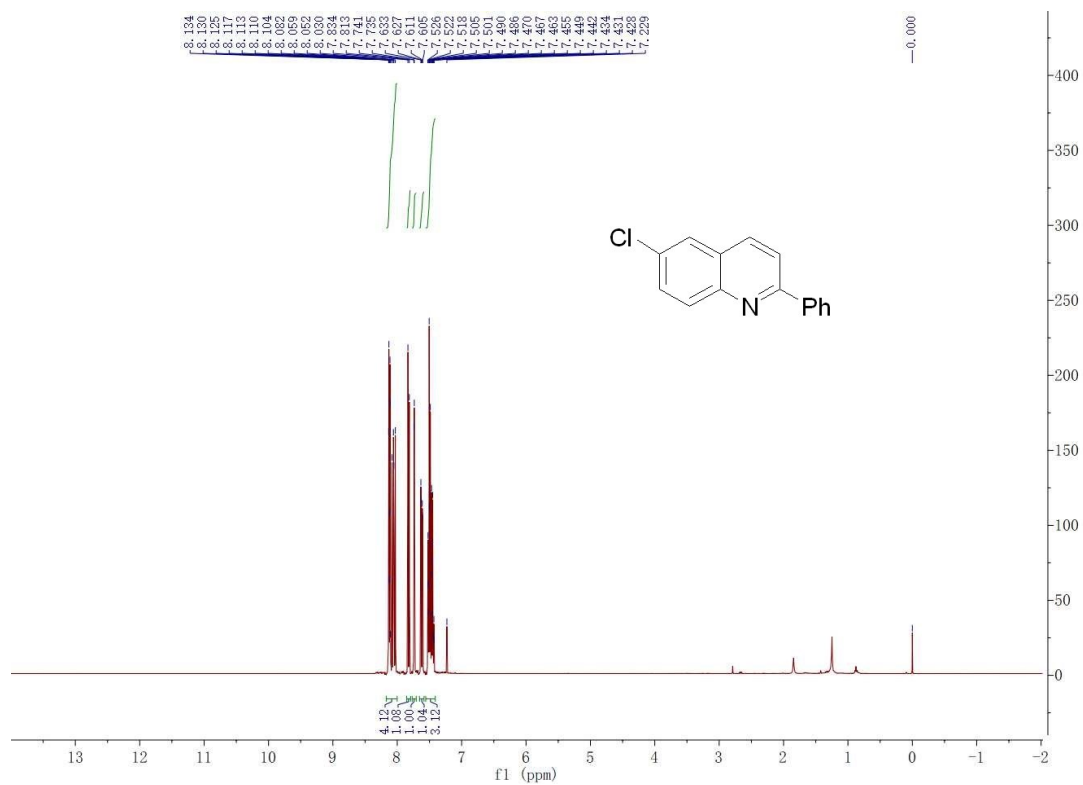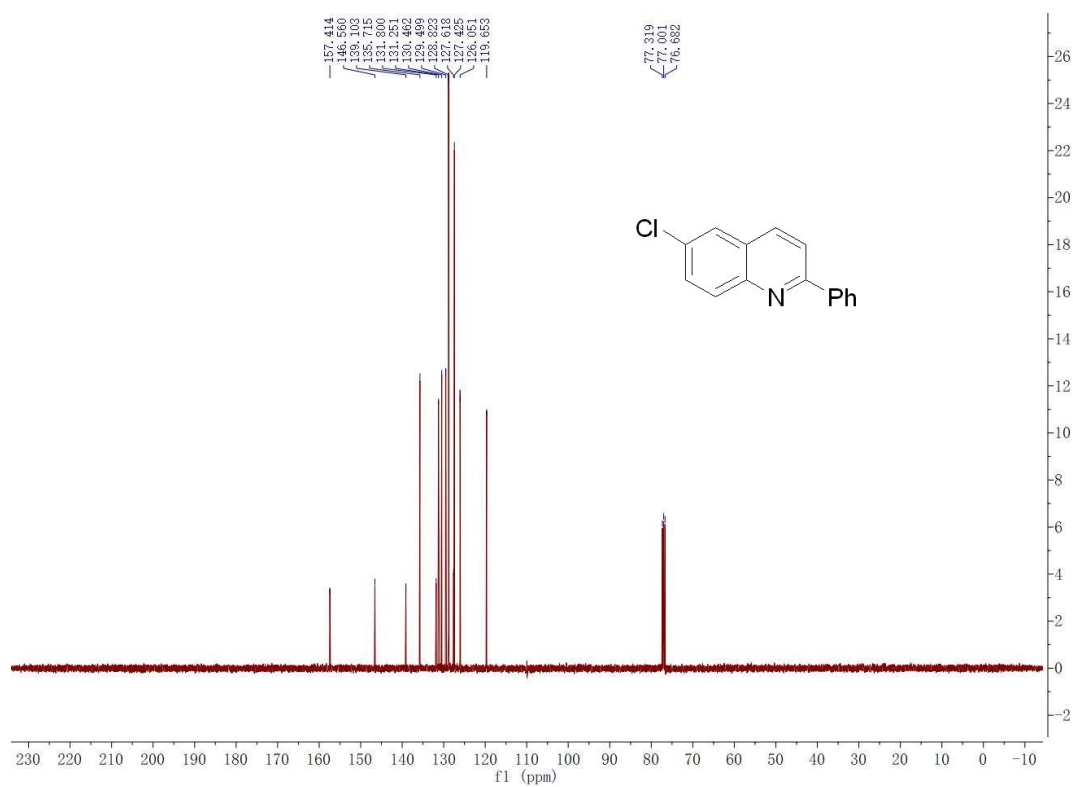

$^1\text{H}$  and  $^{13}\text{C}$  NMR spectra of compound **3ae** in  $\text{CDCl}_3$  (400 MHz)

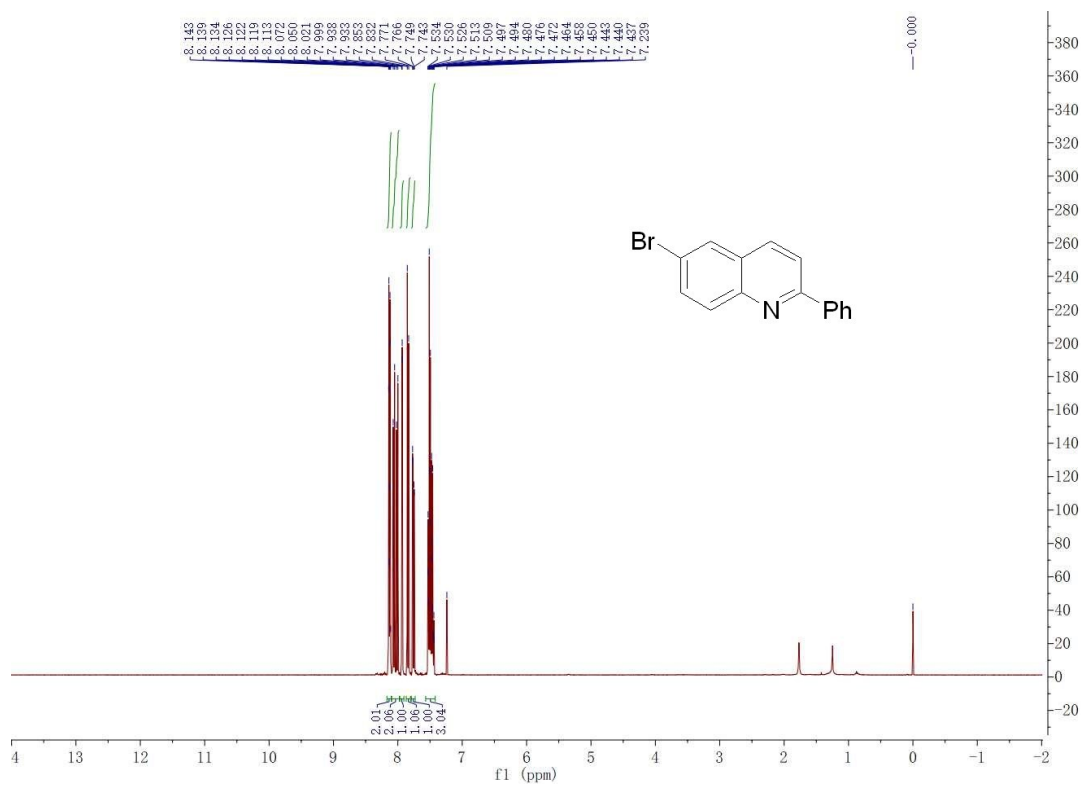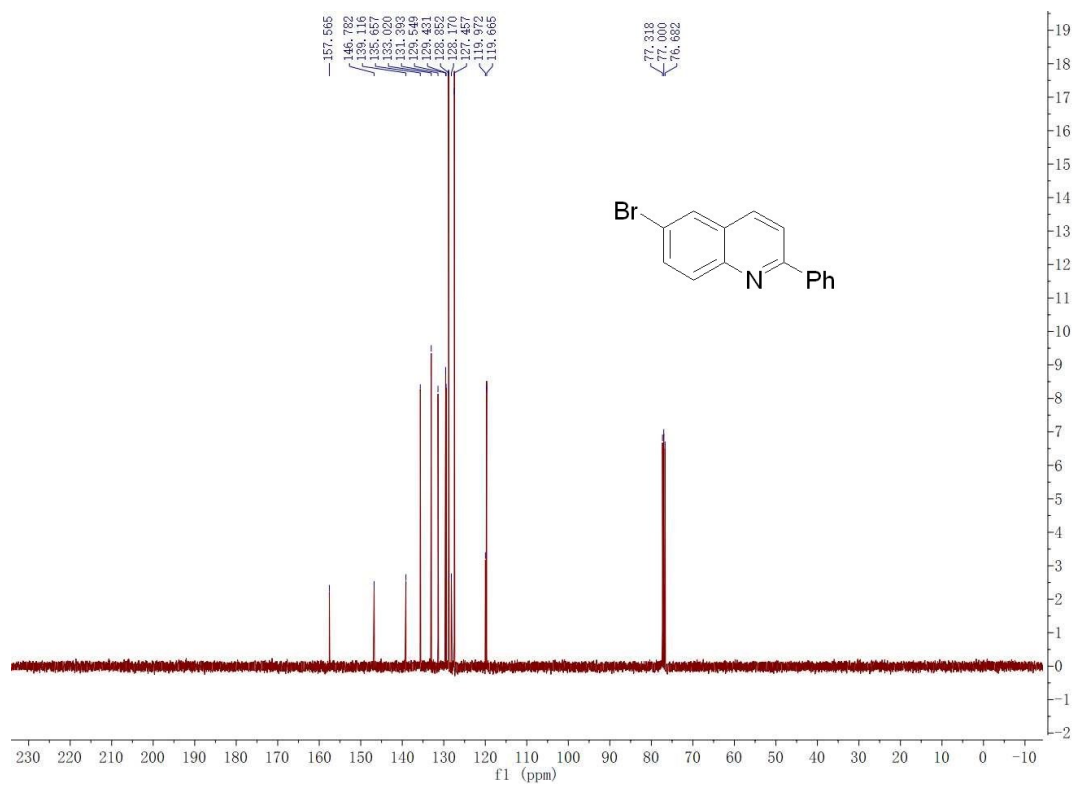

$^1\text{H}$ ,  $^{13}\text{C}$  and  $^{19}\text{F}$  NMR spectra of compound **3af** in  $\text{CDCl}_3$  (400 MHz)

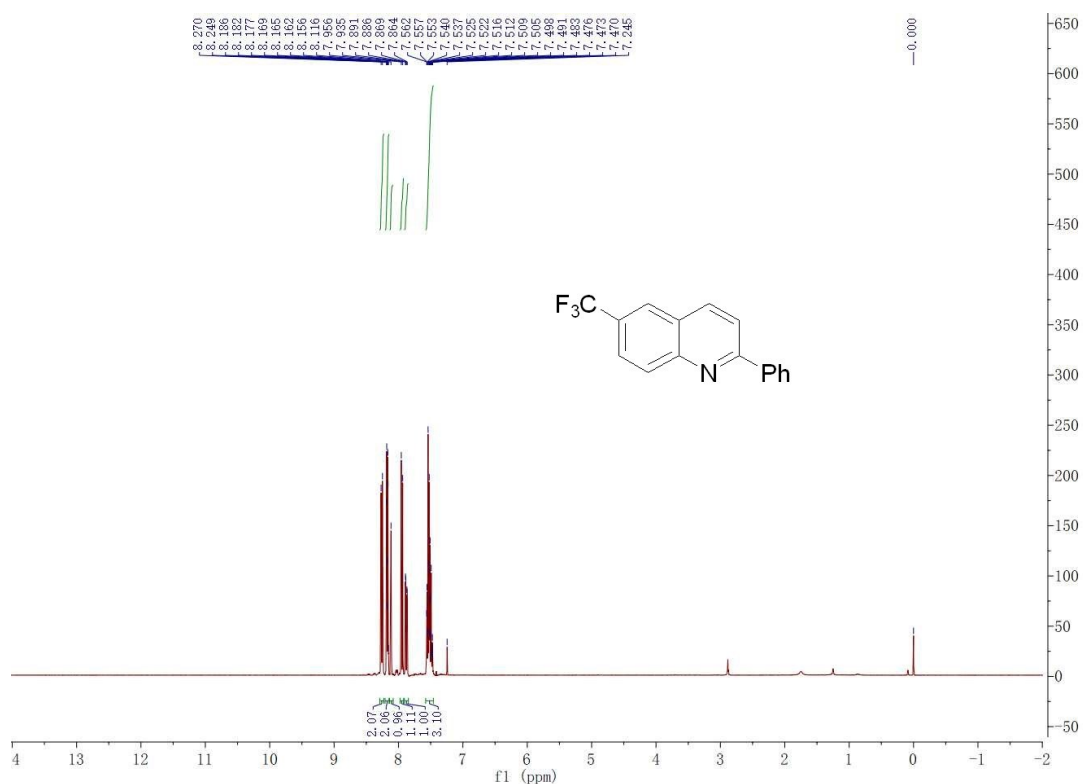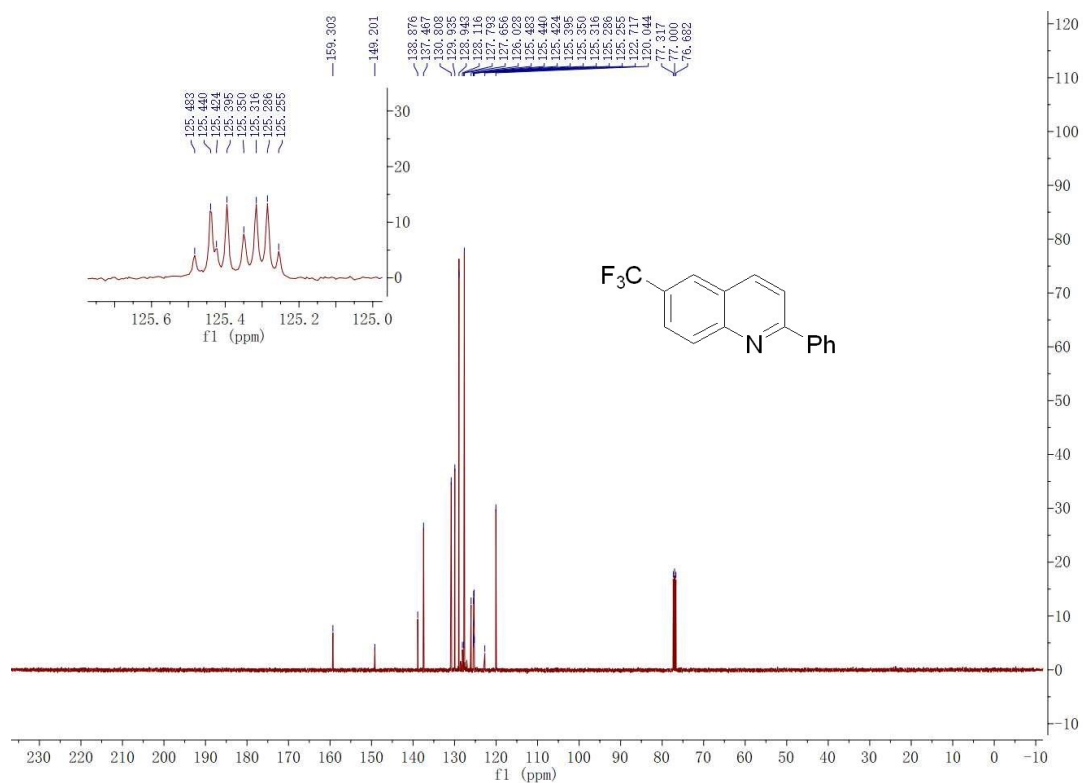

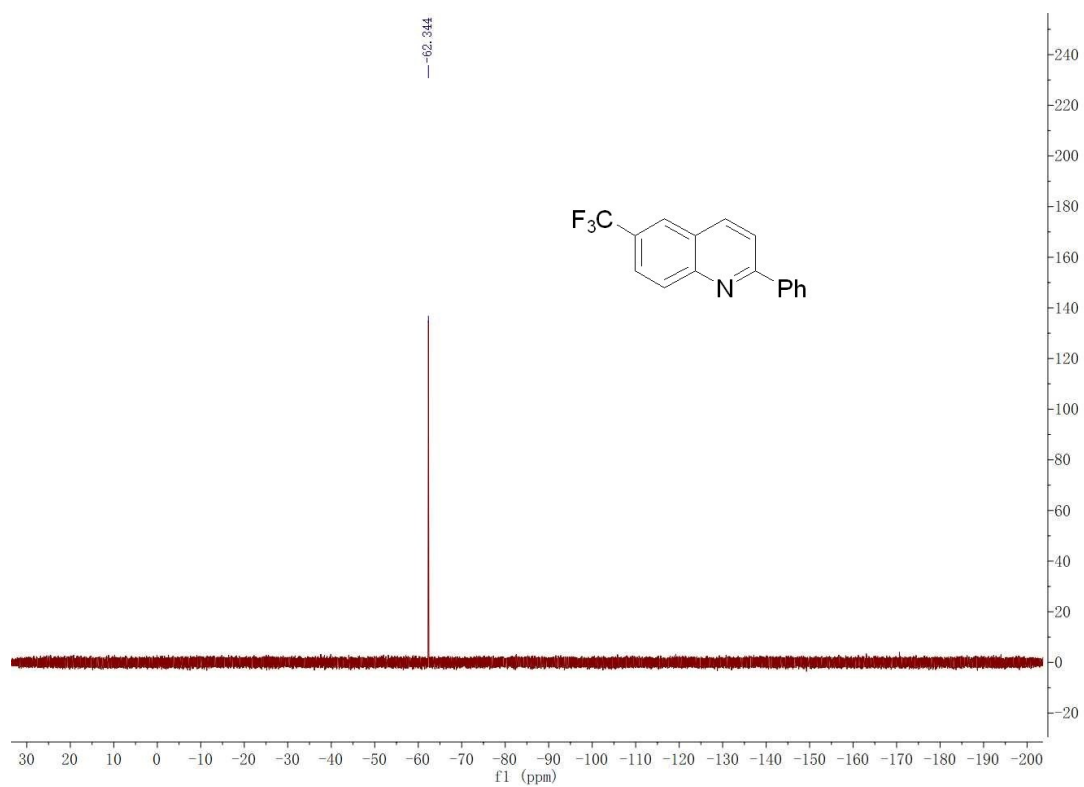

<sup>1</sup>H and <sup>13</sup>C NMR spectra of compound **3ag** in CDCl<sub>3</sub> (400 MHz)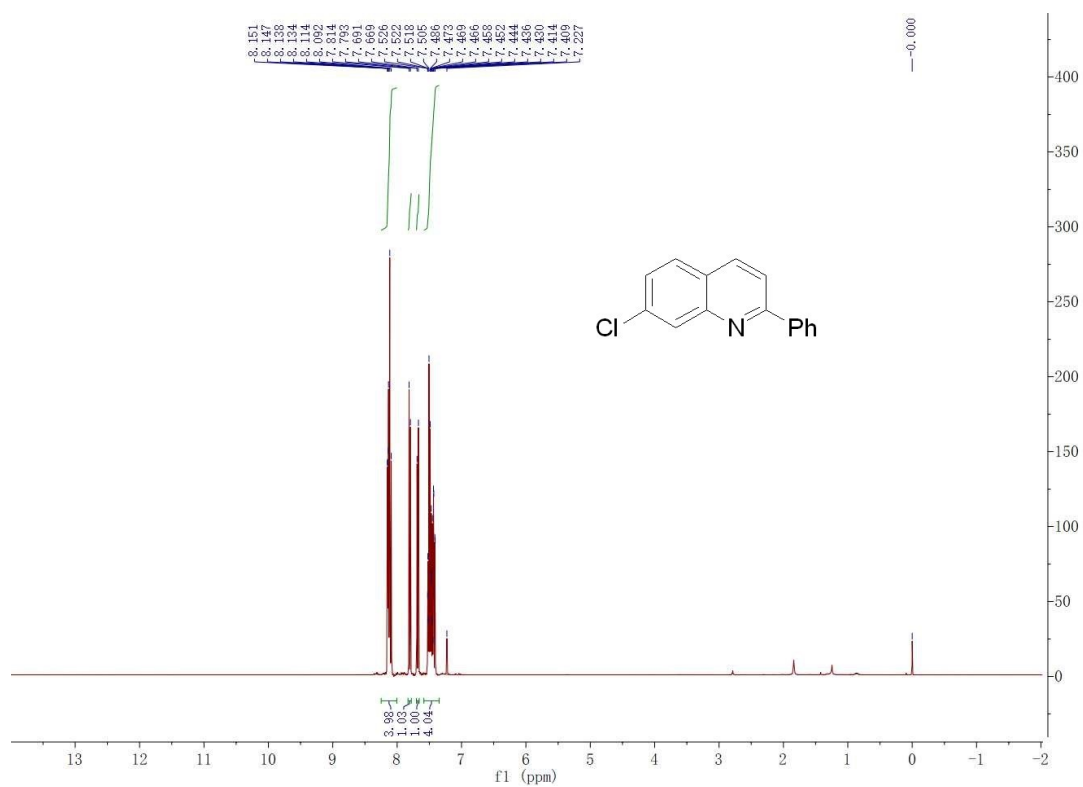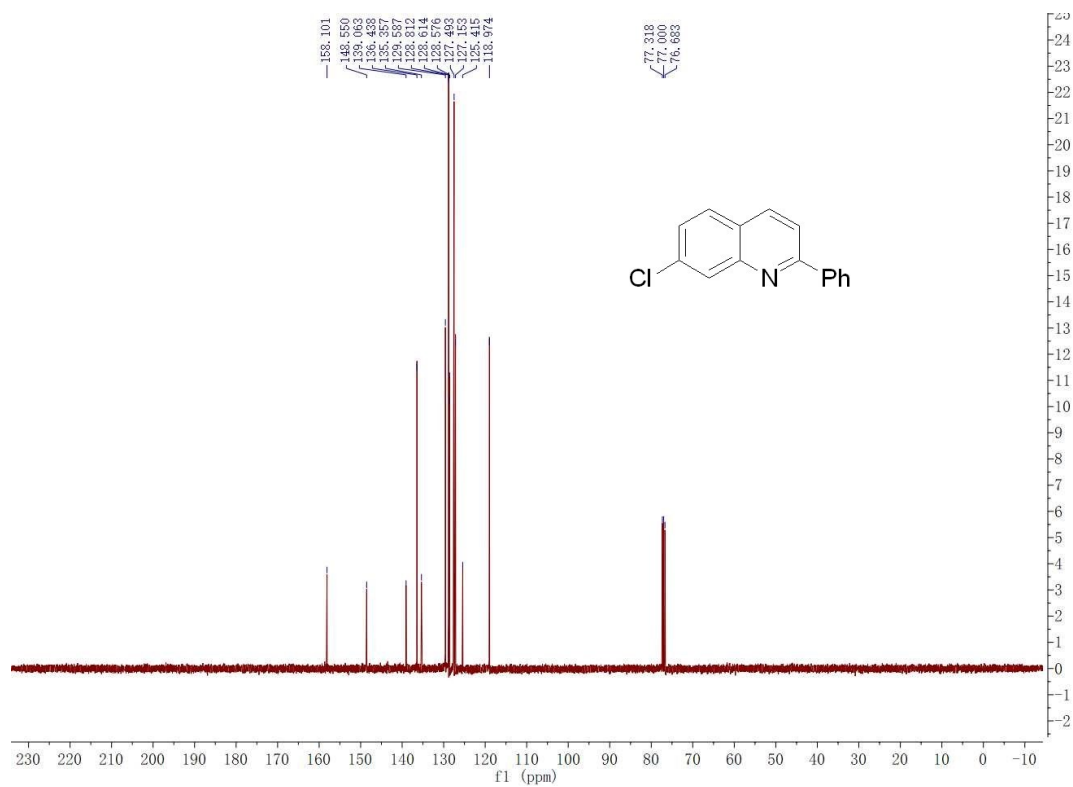

$^1\text{H}$  and  $^{13}\text{C}$  NMR spectra of compound **3ah** in  $\text{CDCl}_3$  (400 MHz)

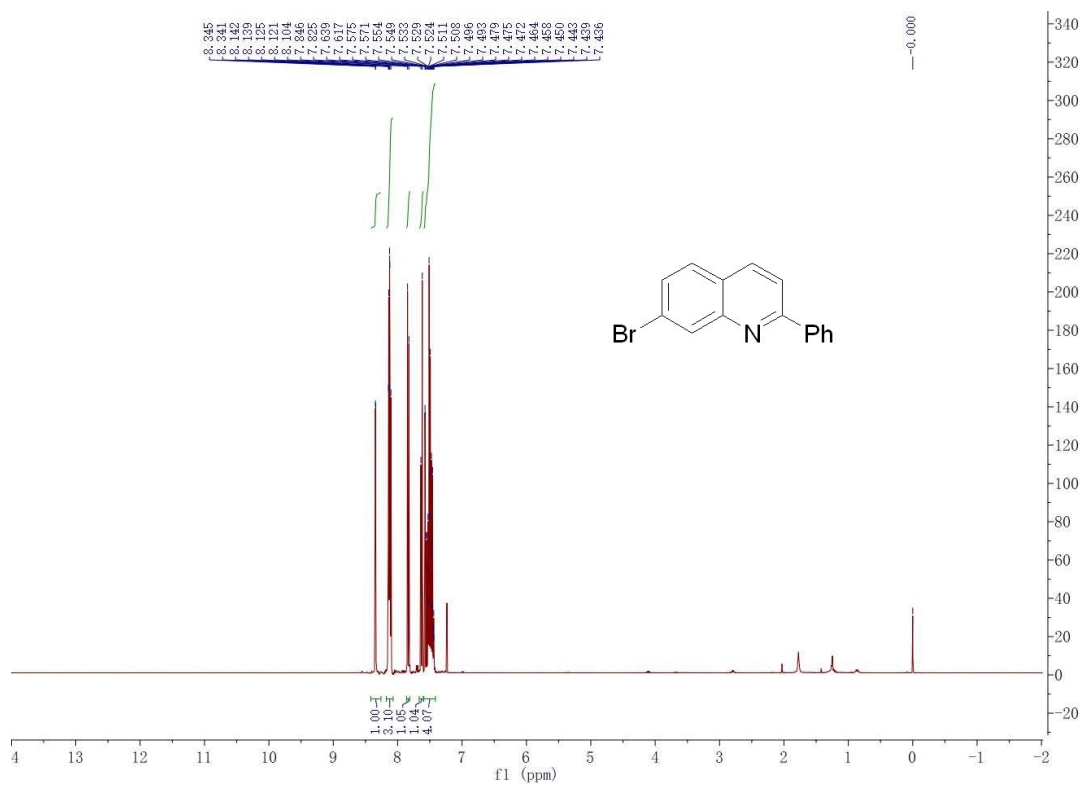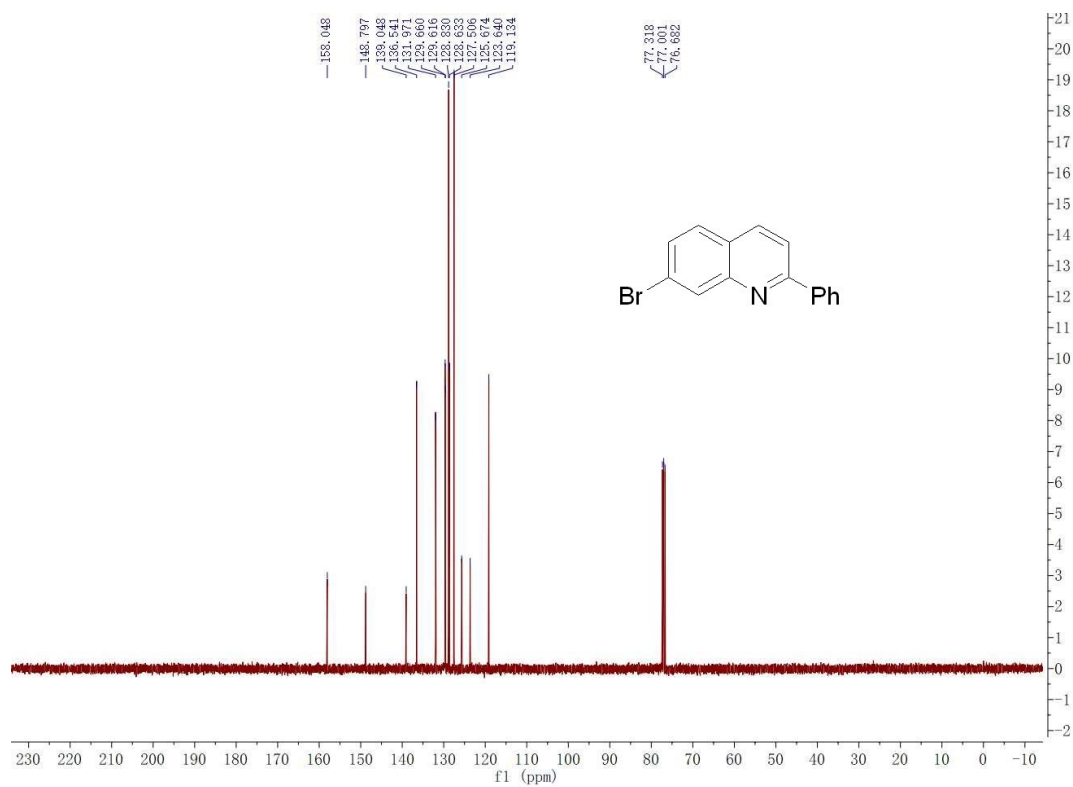

$^1\text{H}$  and  $^{13}\text{C}$  NMR spectra of compound **3ai** in  $\text{CDCl}_3$  (400 MHz)

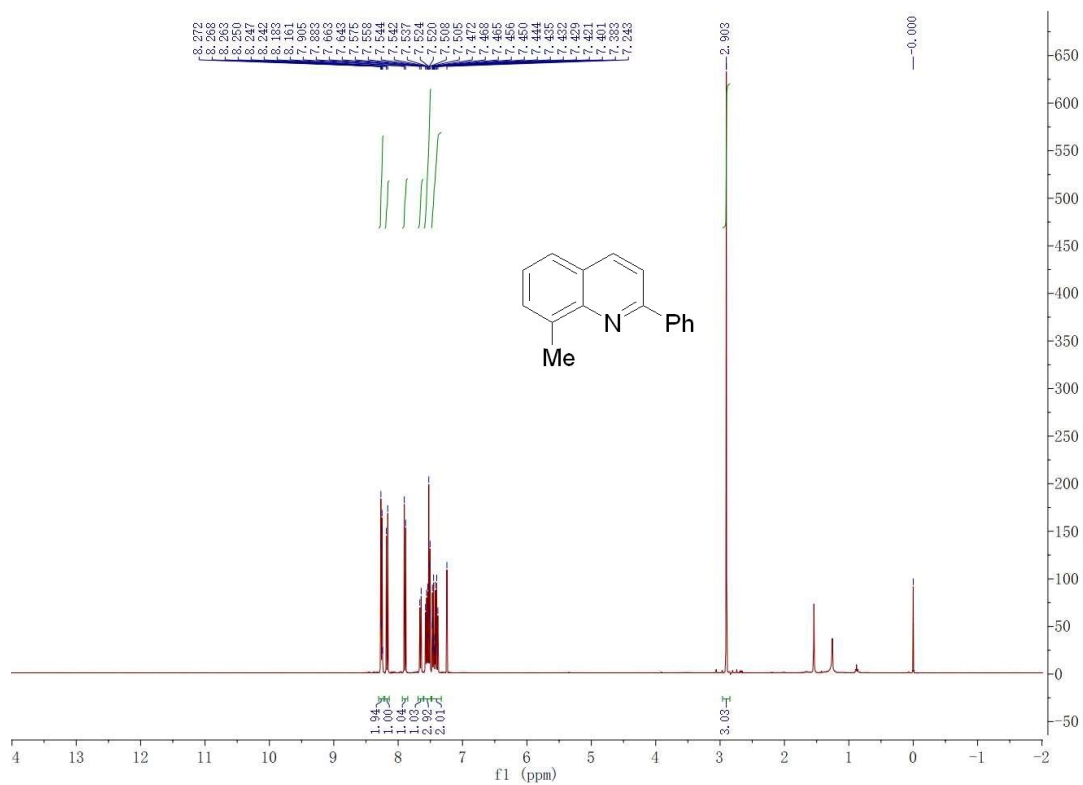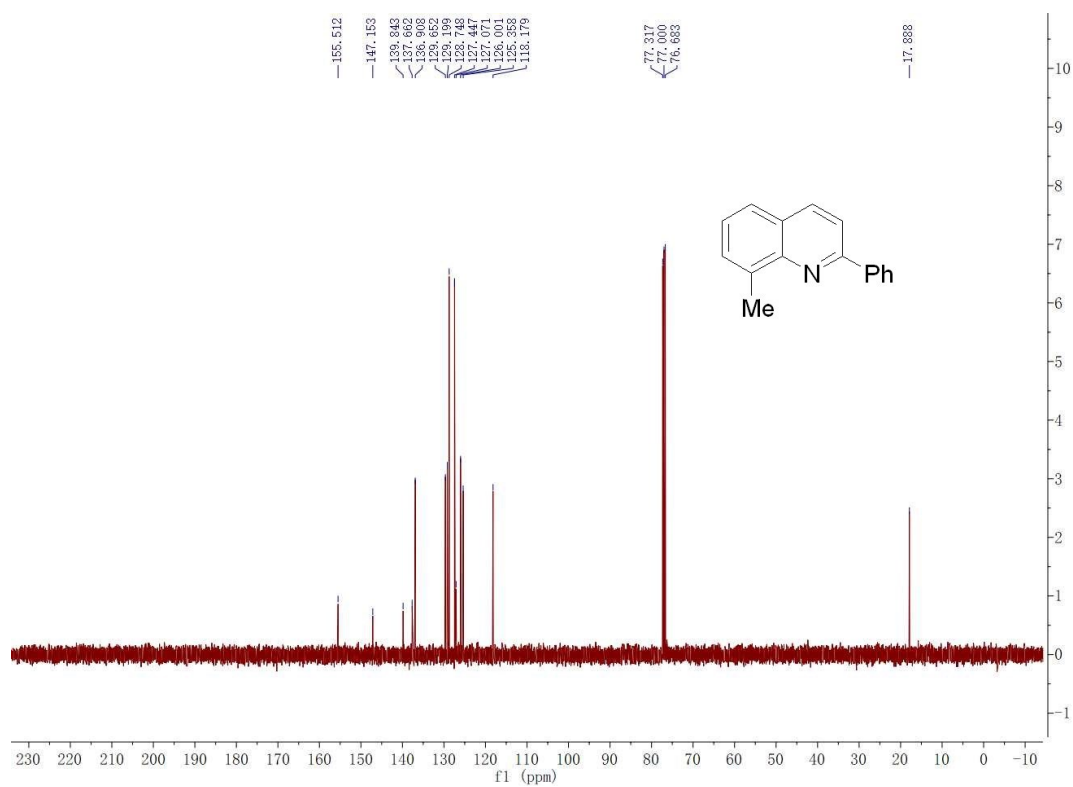

$^1\text{H}$  and  $^{13}\text{C}$  NMR spectra of compound **3aj** in  $\text{CDCl}_3$  (400 MHz)

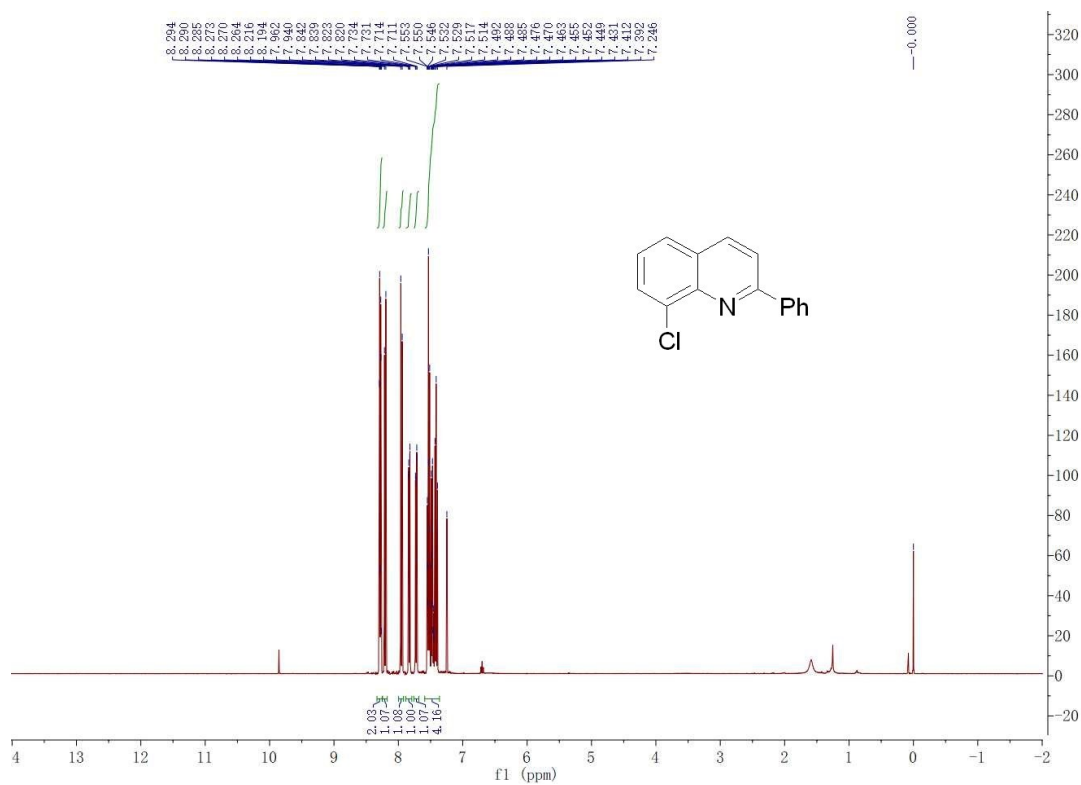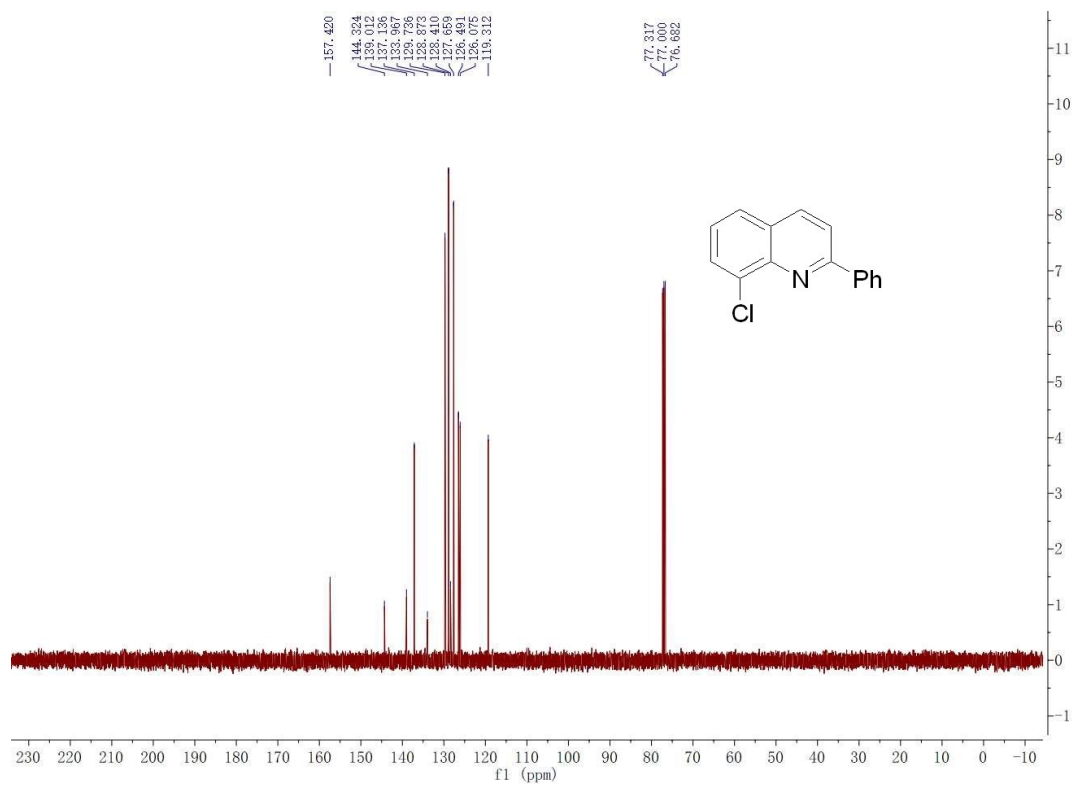



<sup>1</sup>H and <sup>13</sup>C NMR spectra of compound **3ak** in CDCl<sub>3</sub> (400 MHz)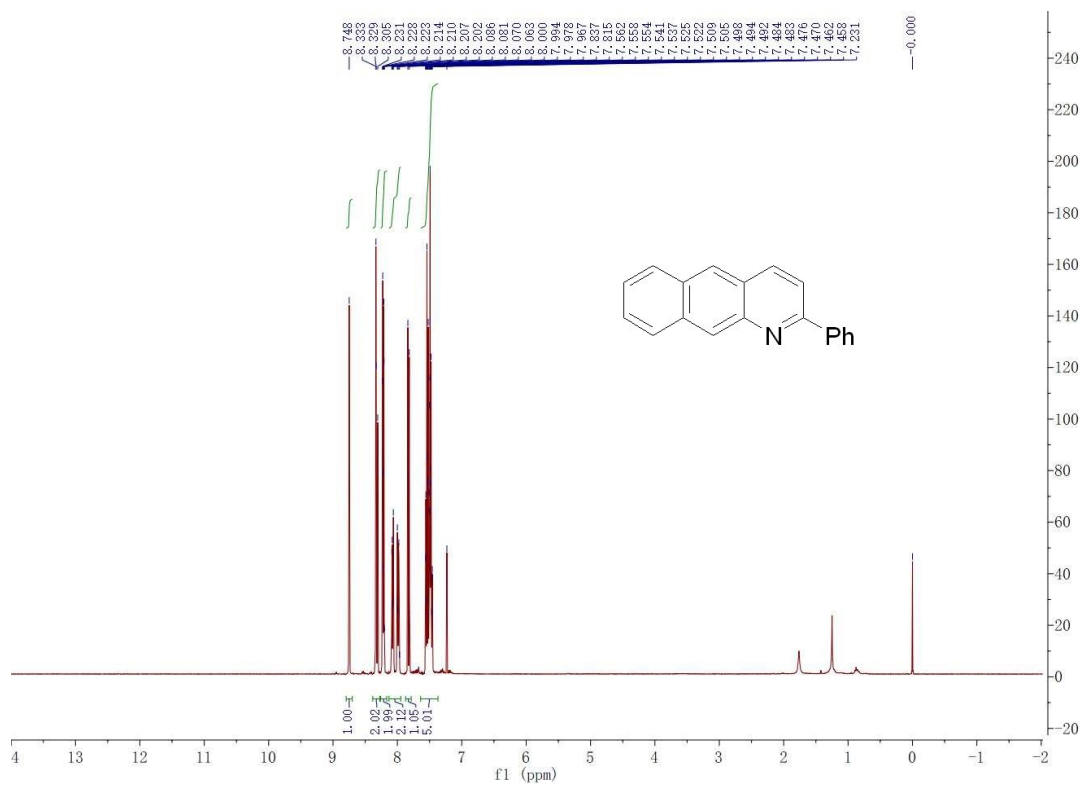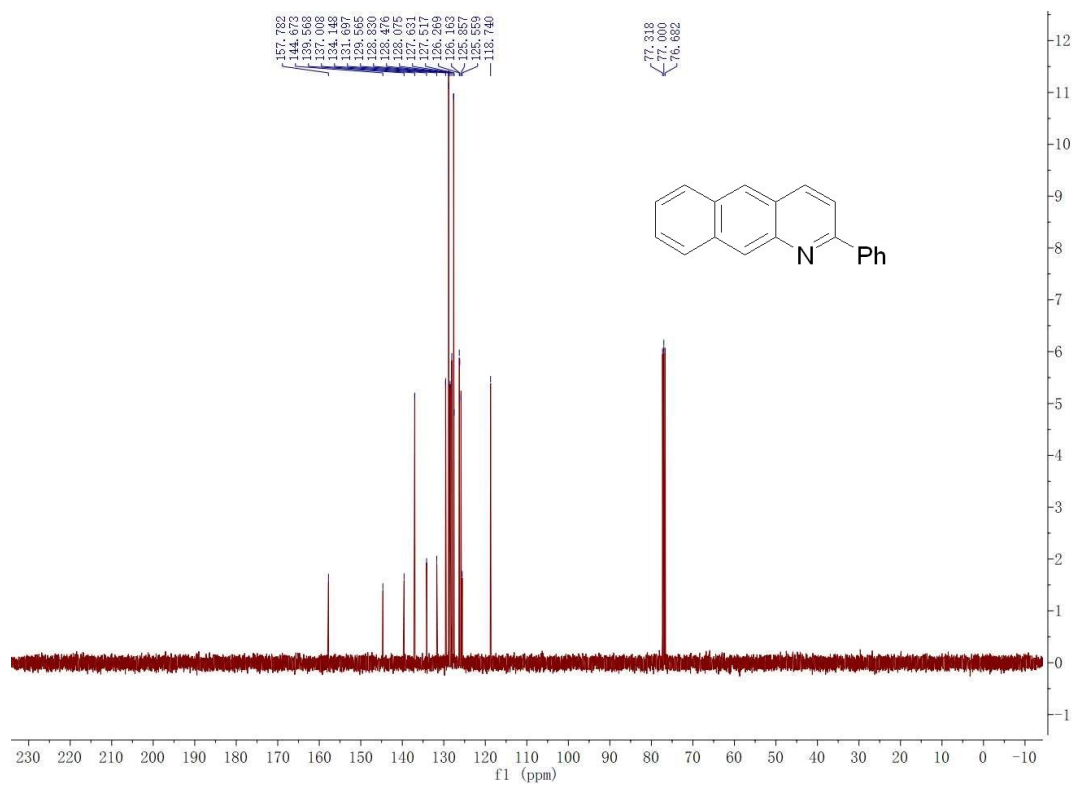

$^1\text{H}$  and  $^{13}\text{C}$  NMR spectra of compound **3al** in  $\text{CDCl}_3$  (400 MHz)

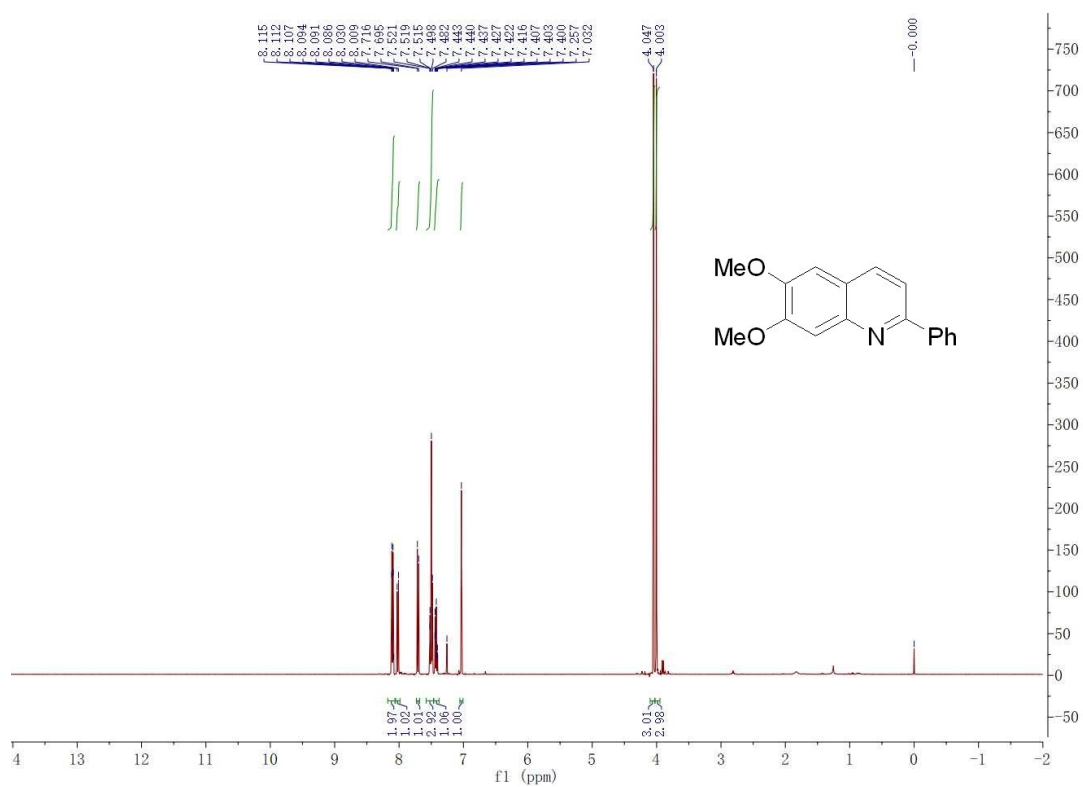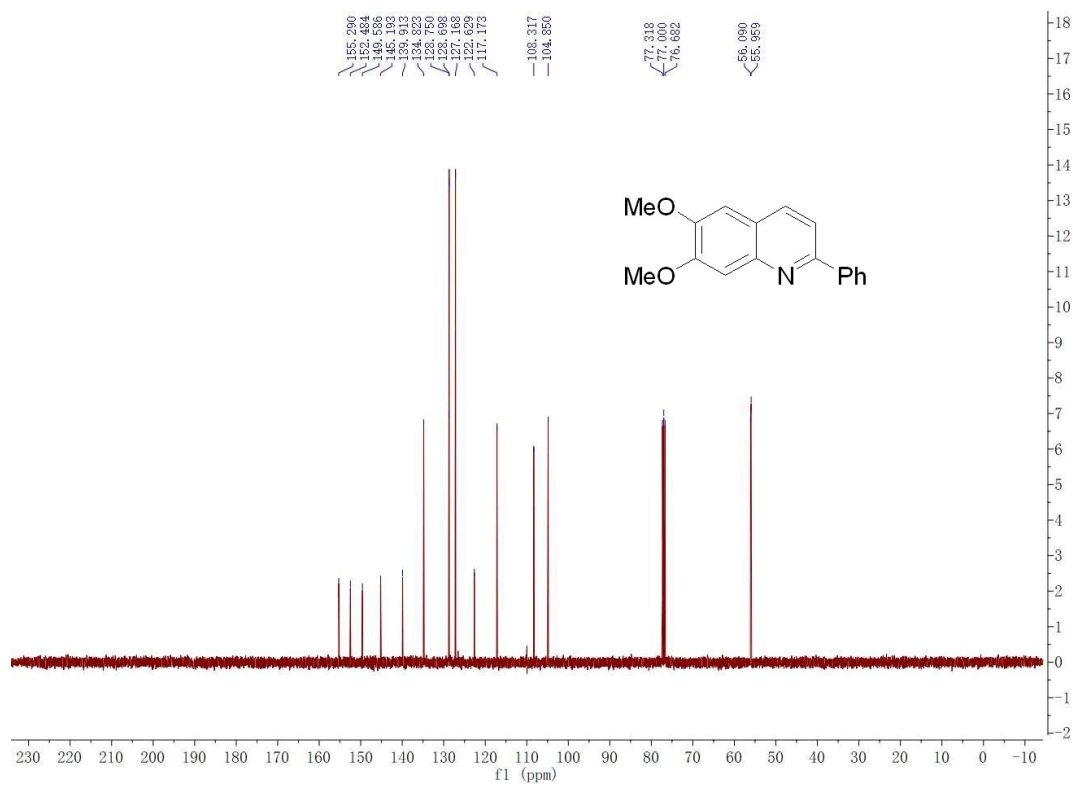

$^1\text{H}$  and  $^{13}\text{C}$  NMR spectra of compound **3am** in  $\text{CDCl}_3$  (400 MHz)

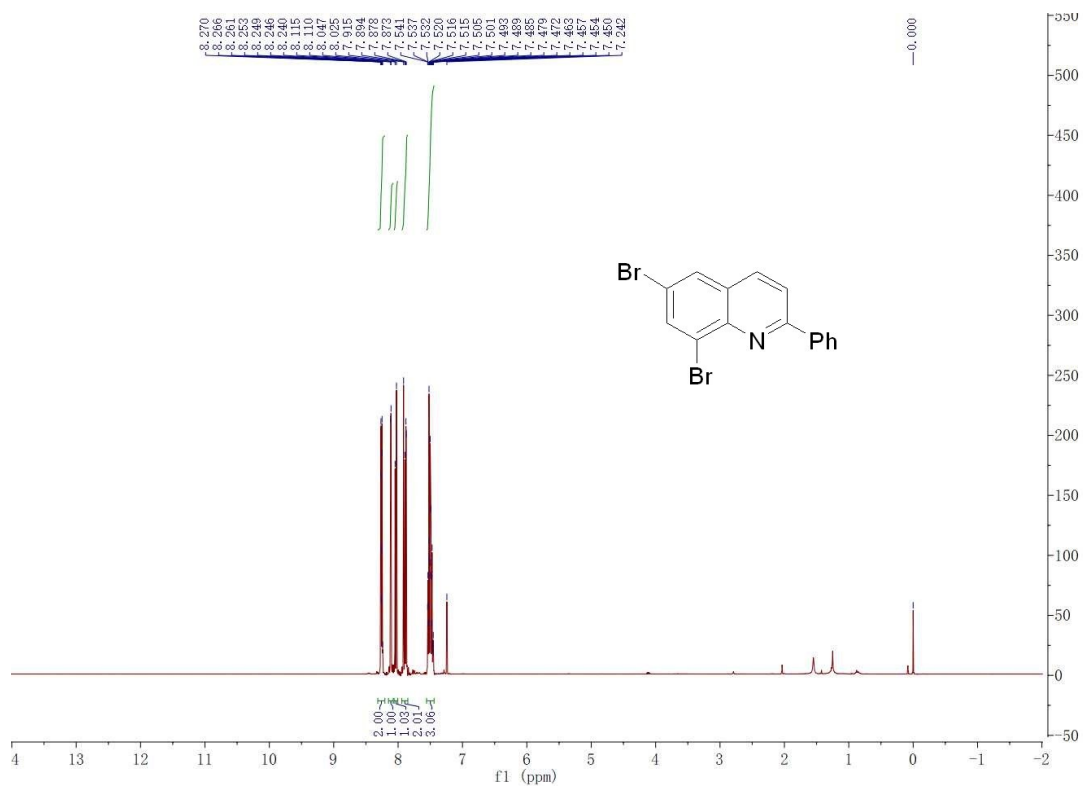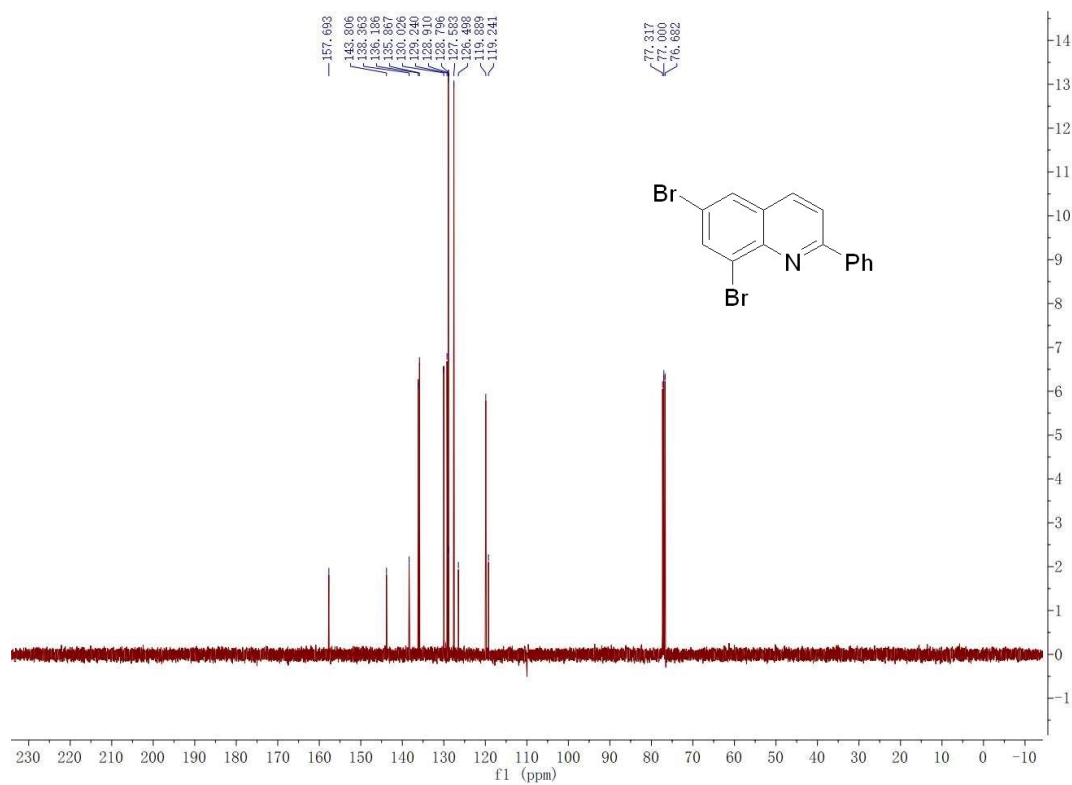

<sup>1</sup>H and <sup>13</sup>C NMR spectra of compound **3an** in CDCl<sub>3</sub> (400 MHz)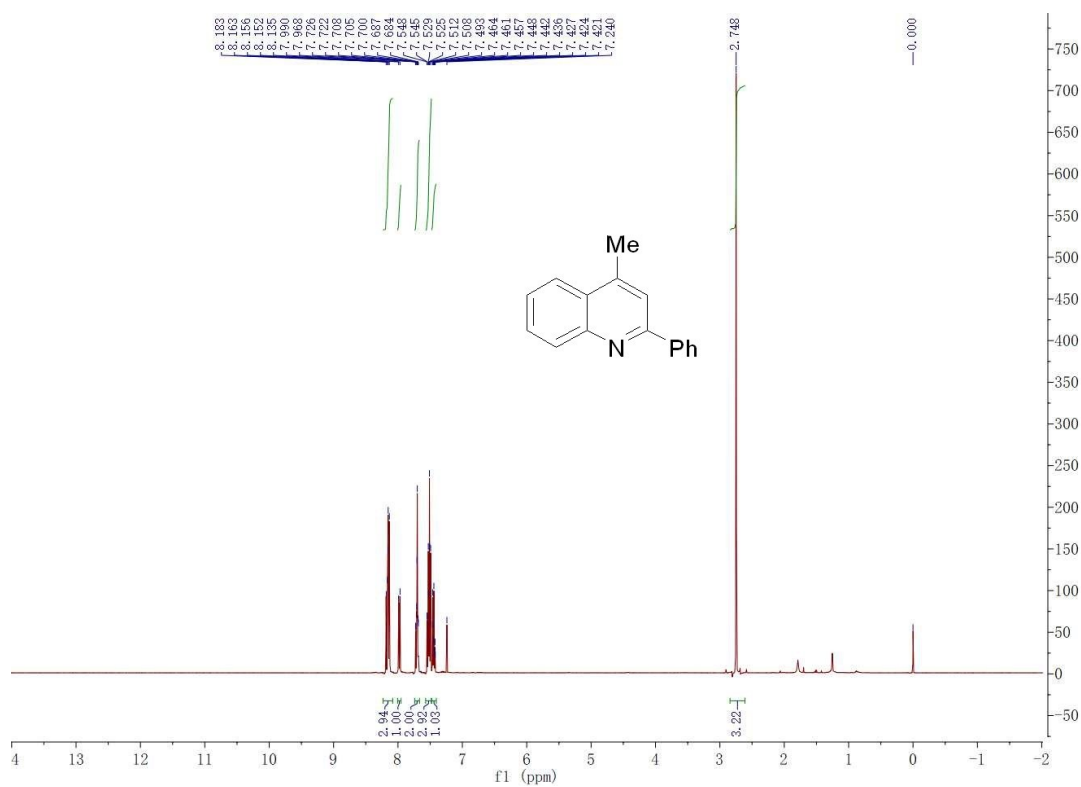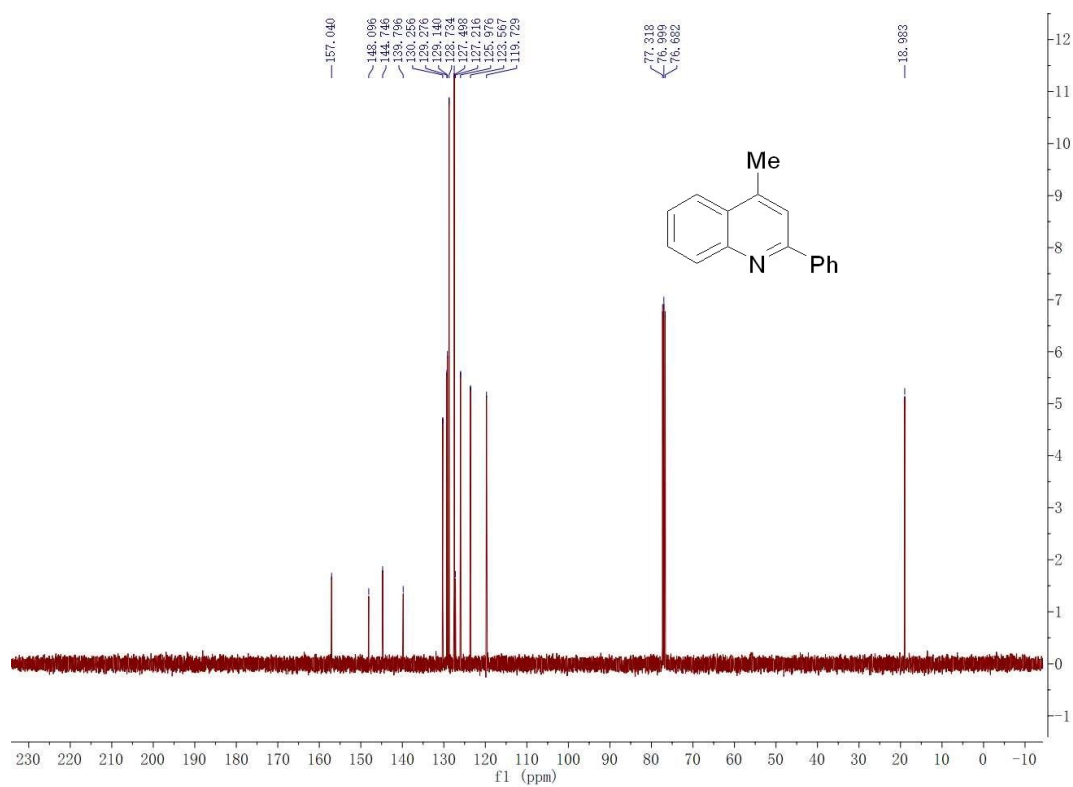

$^1\text{H}$  and  $^{13}\text{C}$  NMR spectra of compound **3ao** in  $\text{CDCl}_3$  (400 MHz)

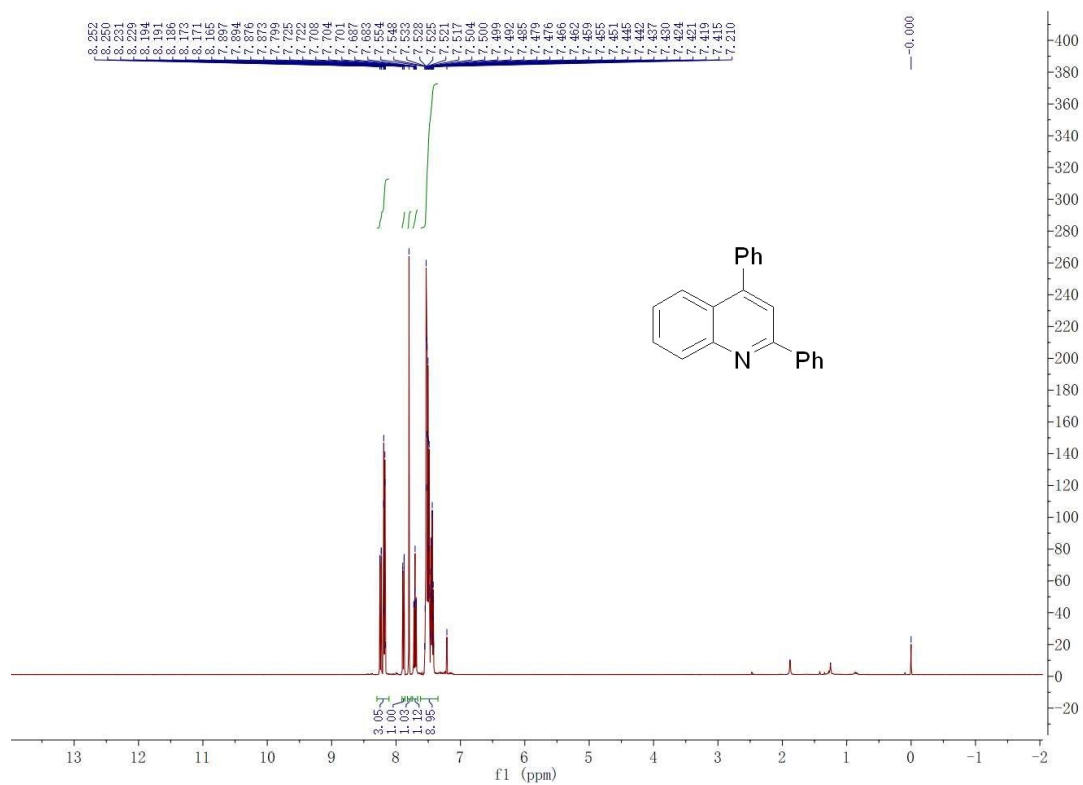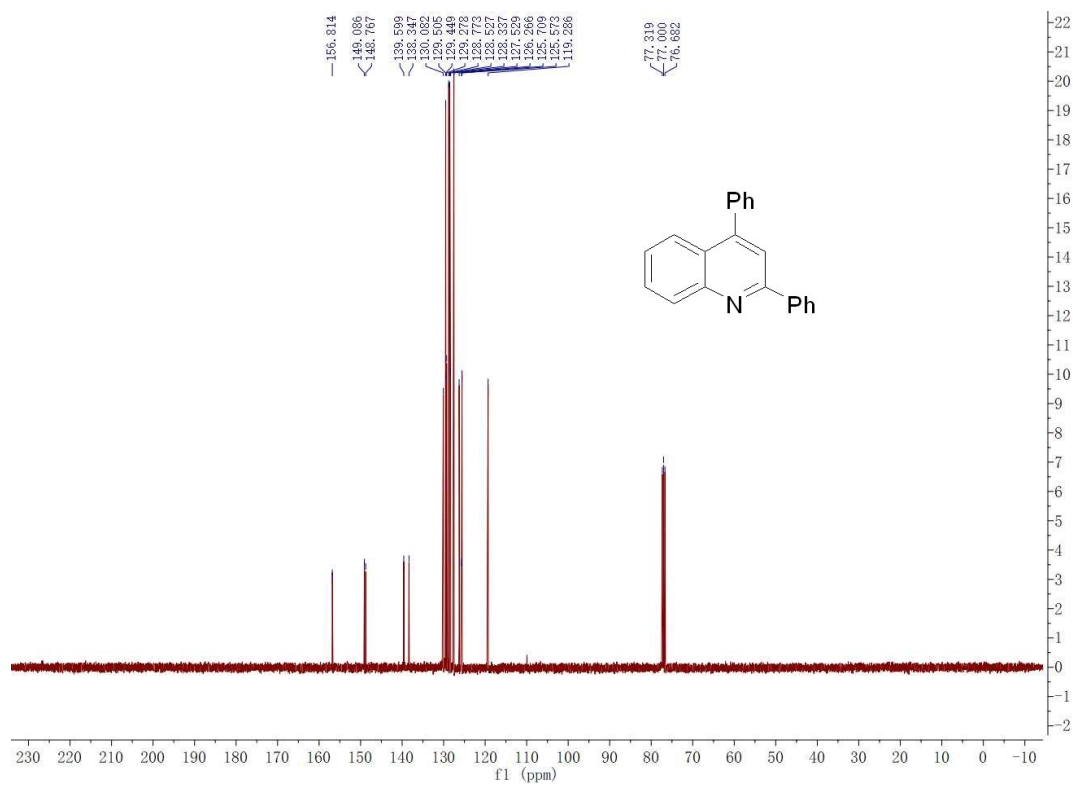

$^1\text{H}$  and  $^{13}\text{C}$  NMR spectra of compound **3ap** in  $\text{CDCl}_3$  (400 MHz)

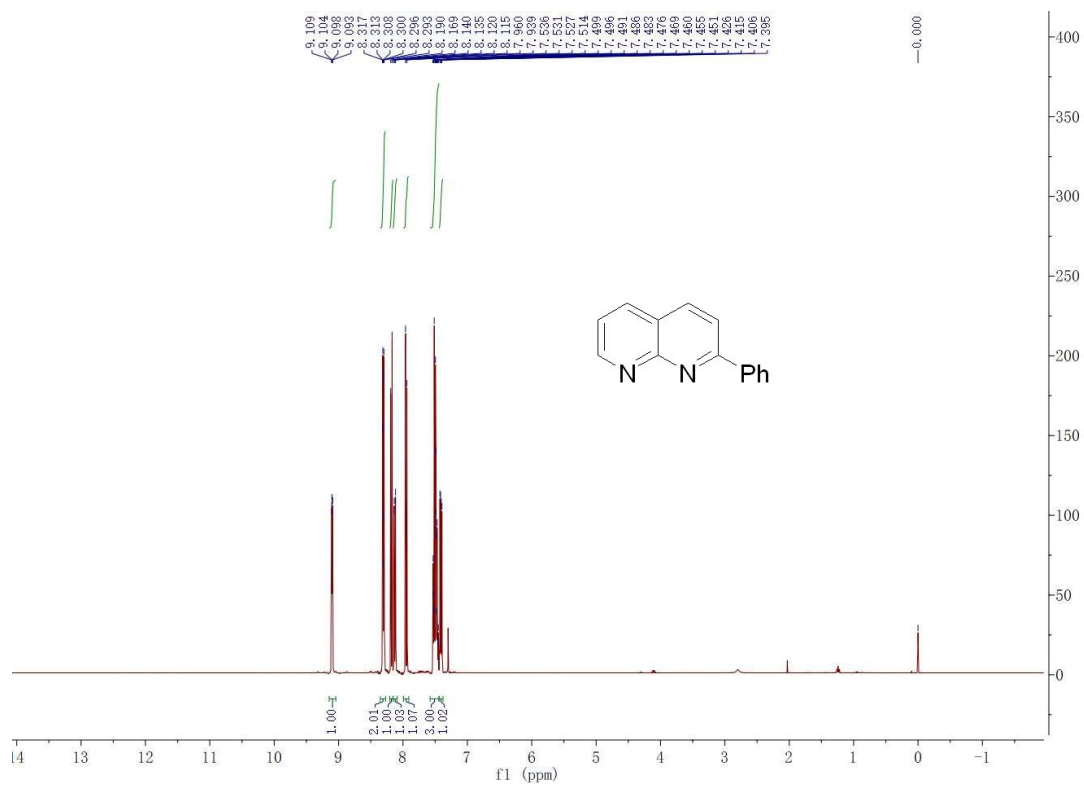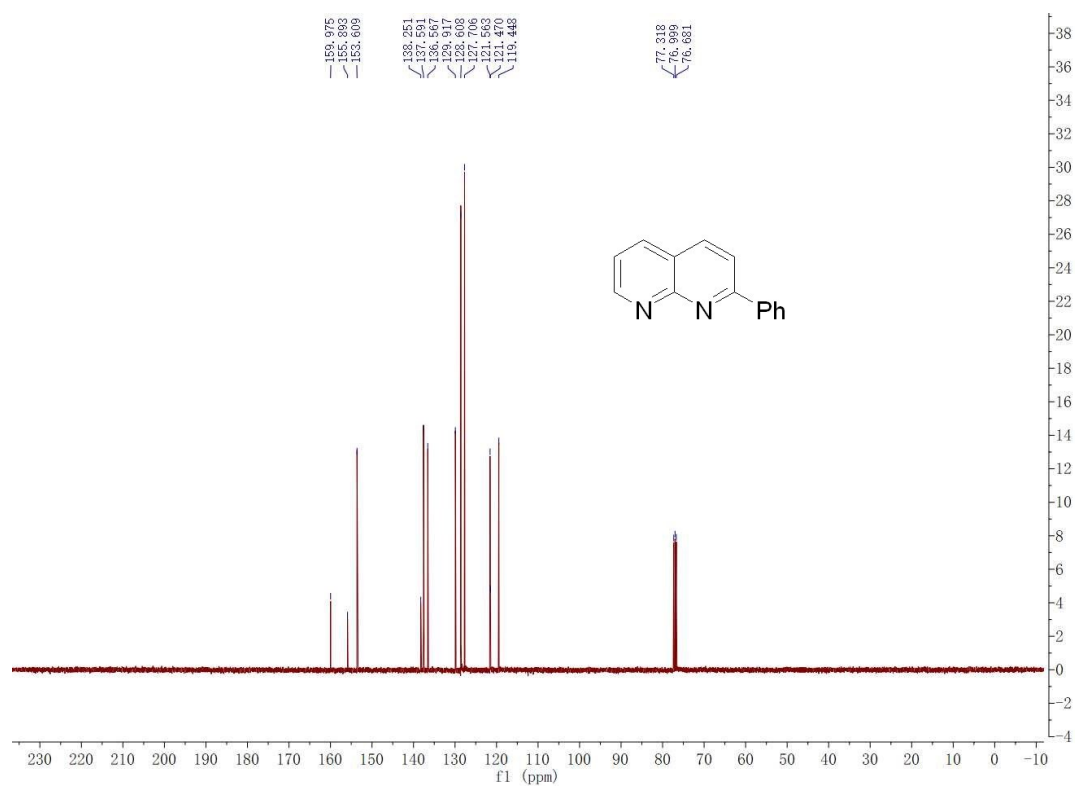

$^1\text{H}$  and  $^{13}\text{C}$  NMR spectra of compound **3aq** in  $\text{CDCl}_3$  (400 MHz)

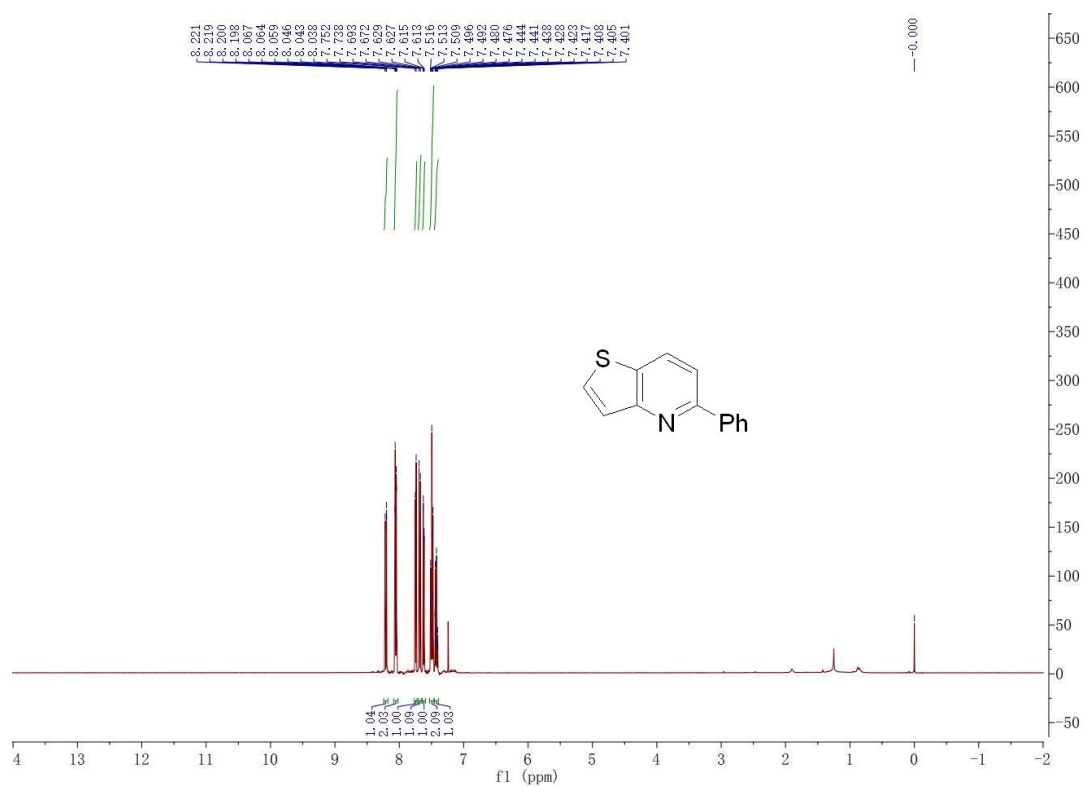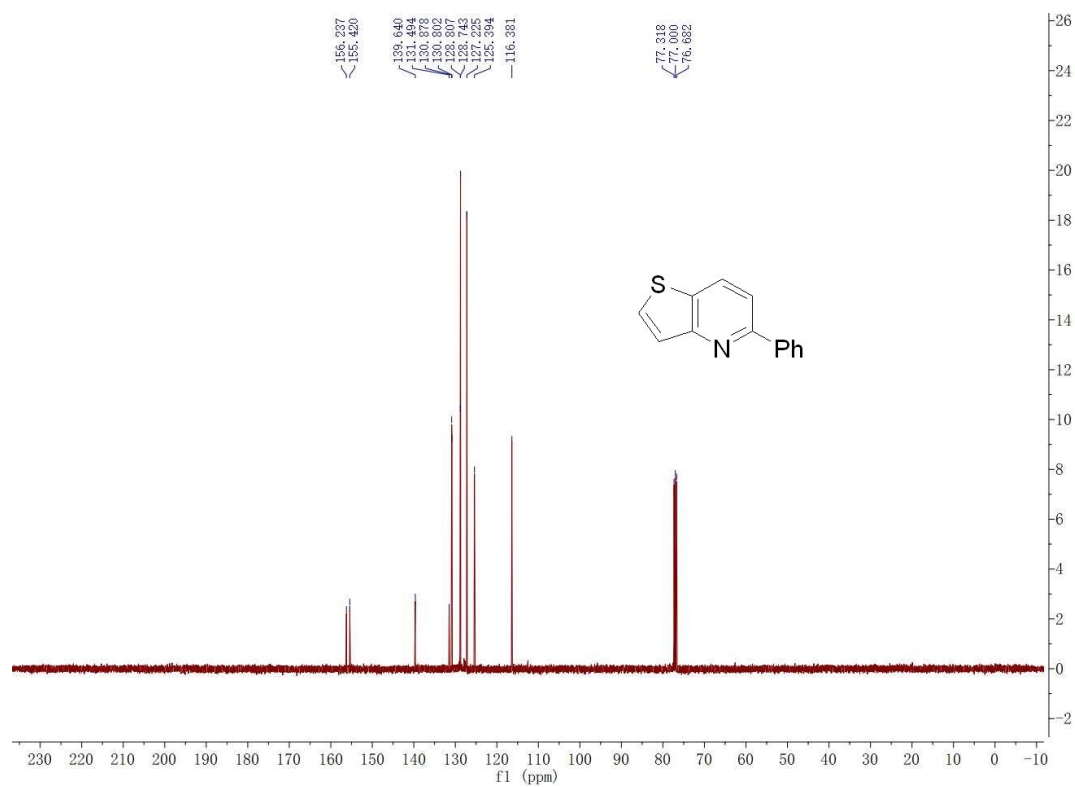

Supplement: d0ob02348e1.pdf [file d0ob02348e1.pdf]
